# Supplementary material for: Origins of regio- and stereoselectivity in Cu-catalyzed alkyne difunctionalization with CO2 and organoboranes
Source: Royal Society of Chemistry journal article supplement (doi:10.1039/d1qo01788h), 2022-01-01
Supplement: d1qo01788h1.pdf [file d1qo01788h1.pdf]

## Electronic Supplementary Information

### Origins of regio- and stereoselectivity in Cu-catalyzed alkyne difunctionalization with CO<sub>2</sub> and organoboranes

Lingfei Hu<sup>†</sup>, Han Gao<sup>†</sup>, Yanlei Hu<sup>†</sup>, Xiangying Lv<sup>†</sup>, Yan-Bo Wu<sup>‡</sup> and Gang Lu<sup>\*†</sup>

<sup>†</sup> School of Chemistry and Chemical Engineering, Key Laboratory of Colloid and Interface Chemistry, Ministry of Education, Shandong University, Jinan, Shandong 250100, China

<sup>‡</sup> Key Lab for Materials of Energy Conversion and Storage of Shanxi Province and Key Lab of Chemical Biology and Molecular Engineering of Ministry of Education, Institute of Molecular Science, Shanxi University, Taiyuan, Shanxi 030006, China

Corresponding Author: [ganglu@sdu.edu.cn](mailto:ganglu@sdu.edu.cn)

#### Table of Contents

|                                                                               |     |
|-------------------------------------------------------------------------------|-----|
| Comparison of 1,2-Migration Barriers Using Different Levels of Theories ..... | S2  |
| Formation of Alkynyl-Cu Intermediate.....                                     | S3  |
| Interactions of K <sup>+</sup> -π and Cu <sup>+</sup> -π .....                | S4  |
| Competing Pathways .....                                                      | S4  |
| Comparison of CO <sub>2</sub> Insertion Transition States.....                | S6  |
| Charge Density Difference .....                                               | S7  |
| The in-plane π Orbital of L-Cu-alkyne along IRC .....                         | S8  |
| Energy Terms of EDA along IRC .....                                           | S9  |
| Cartesian Coordinates (Å) and Energies of the Optimized Structures .....      | S10 |

## Comparison of 1,2-Migration Barriers Using Different Levels of Theories

To validate the conclusion based on the method used in the present study, we computed the barriers of syn/anti-1,2 migration (**TS9** and **TS8**) using a few popular modern density functionals and basis sets (Table S1). Although the absolute barriers of **TS8** and **TS9** differ by a few kcal/mol among the methods tested, the trend of barrier difference ( $\Delta\Delta G_{\text{sol}}^{\ddagger}$ ), i.e., the stereoselectivity of 1,2-migration, is only minimally affected by the choice of density functionals in both optimization and single-point energy calculations.

**Table S1. Comparison of barriers (in kcal/mol) of syn-to-metal (TS8) and anti-to-metal (TS9) 1,2-migration using different levels of theories.**

| Method for Single-Point Energy Calculation in Solvent Using SMD | Method for Gas-Phase Geometry Optimization | Barrier of <b>TS8</b> ( $\Delta G_{\text{sol}}^{\ddagger}$ ) with respect to <b>15</b> | Barrier of <b>TS9</b> ( $\Delta G_{\text{sol}}^{\ddagger}$ ) with respect to <b>15</b> | $\Delta\Delta G_{\text{sol}}^{\ddagger}$ ( <b>TS9</b> – <b>TS8</b> ) |
|-----------------------------------------------------------------|--------------------------------------------|----------------------------------------------------------------------------------------|----------------------------------------------------------------------------------------|----------------------------------------------------------------------|
| B3LYP-D3BJ/<br>SDD-6-311+G(d,p)                                 | B3LYP/<br>LANL2DZ-6-31G(d)                 | 20.2                                                                                   | 22.2                                                                                   | 2.0                                                                  |
| M06/<br>SDD-6-311+G(d,p)                                        |                                            | 21.0                                                                                   | 22.5                                                                                   | 1.5                                                                  |
| M06L/<br>SDD-6-311+G(d,p)                                       |                                            | 22.3                                                                                   | 23.6                                                                                   | 1.3                                                                  |
| $\omega$ B97xD/<br>SDD-6-311+G(d,p)                             |                                            | 21.9                                                                                   | 23.9                                                                                   | 2.0                                                                  |
| B3LYP-D3BJ/<br>SDD-6-311+G(d,p)                                 | B3LYP-D3BJ/<br>LANL2DZ-6-31G(d)            | 21.6                                                                                   | 24.0                                                                                   | 2.4                                                                  |
| M06/<br>SDD-6-311+G(d,p)                                        |                                            | 21.7                                                                                   | 23.5                                                                                   | 1.8                                                                  |
| M06L/<br>SDD-6-311+G(d,p)                                       |                                            | 24.0                                                                                   | 25.6                                                                                   | 1.6                                                                  |
| $\omega$ B97xD/<br>SDD-6-311+G(d,p)                             |                                            | 24.6                                                                                   | 26.3                                                                                   | 1.7                                                                  |
| B3LYP-D3BJ/<br>SDD-6-311+G(d,p)                                 | M06/<br>LANL2DZ-6-31G(d)                   | 18.5                                                                                   | 21.4                                                                                   | 1.9                                                                  |
| M06/<br>SDD-6-311+G(d,p)                                        |                                            | 19.4                                                                                   | 21.6                                                                                   | 2.2                                                                  |
| M06L/<br>SDD-6-311+G(d,p)                                       |                                            | 21.2                                                                                   | 22.9                                                                                   | 1.7                                                                  |
| $\omega$ B97xD/<br>SDD-6-311+G(d,p)                             |                                            | 20.9                                                                                   | 23.8                                                                                   | 2.9                                                                  |
| B3LYP-D3BJ/<br>SDD-6-311+G(d,p)                                 | $\omega$ B97xD/<br>LANL2DZ-6-31G(d)        | 17.1                                                                                   | 20.8                                                                                   | 3.7                                                                  |
| M06/<br>SDD-6-311+G(d,p)                                        |                                            | 18.0                                                                                   | 20.7                                                                                   | 2.7                                                                  |
| M06L/<br>SDD-6-311+G(d,p)                                       |                                            | 19.9                                                                                   | 22.4                                                                                   | 2.5                                                                  |
| $\omega$ B97xD/<br>SDD-6-311+G(d,p)                             |                                            | 19.5                                                                                   | 23.3                                                                                   | 2.8                                                                  |

## Formation of Alkynyl-Cu Intermediate

Under the experimental condition, LCu-OMe (**5**) is expected to be formed from the reaction of LCuCl with KOMe. The acidic alkyne C(sp)-H can be cleaved via **TS13** with a quite low barrier (Fig. S1). The release of alkynyl-Cu intermediate **14** is endothermic by 13 kcal/mol. This result indicates the formation of alkynyl-Cu species is accessible. The following reaction steps based on alkynyl-Cu are discussed in Fig. 2 of the main text.

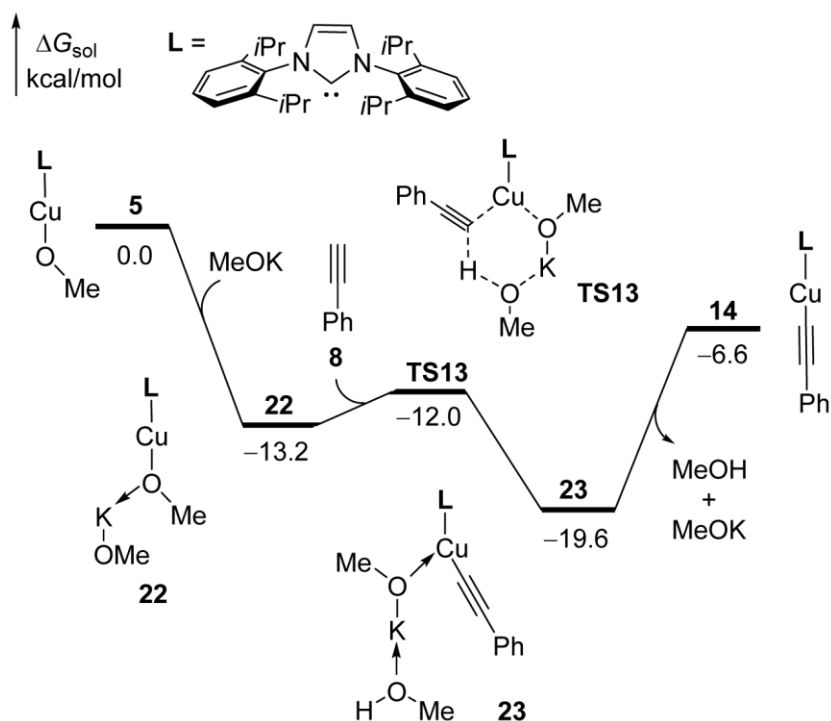

**Fig. S1.** Energy profile for the formation of alkynyl-Cu species.

## Interactions of $K^+-\pi$ and $Cu^+-\pi$

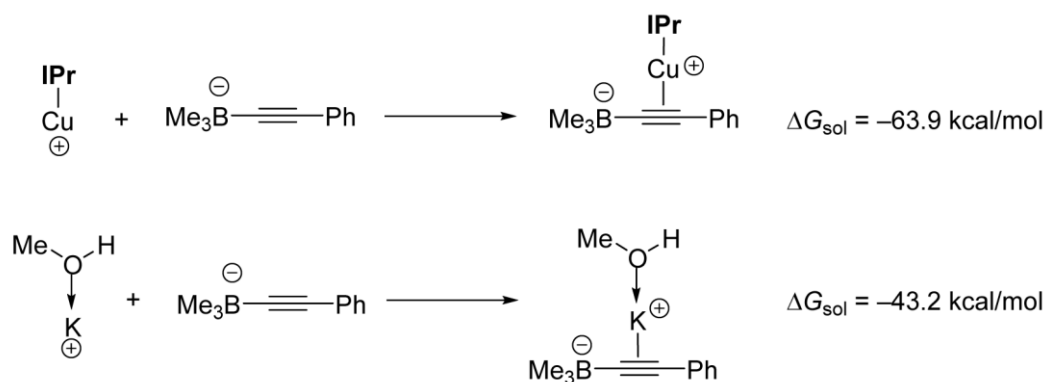

**Fig. S2.** Energetics of  $K^+-\pi$  and  $Cu^+-\pi$  interactions.

## Competing Pathways

The transition states of concerted protonation and 1,2-migration (**S-TS5** and **S-TS6**, Fig. S3) were computed. These transition states require high barriers ( $\Delta G^{\ddagger} > 35$  kcal/mol), which are comparable with the  $K^+$ -mediated 1,2-migration transition states (**TS5** and **TS6**,  $\Delta G^{\ddagger} > 36$  kcal/mol, Fig. 1 in the manuscript). Compared to the  $Cu^+$ -mediated 1,2-migrations with much lower barriers (**TS8** and **TS9**,  $\Delta G^{\ddagger} \approx 20$  kcal/mol, Fig. 2), the proton-mediated 1,2-migration pathways (**S-TS5** and **S-TS6**) can also be ruled out.

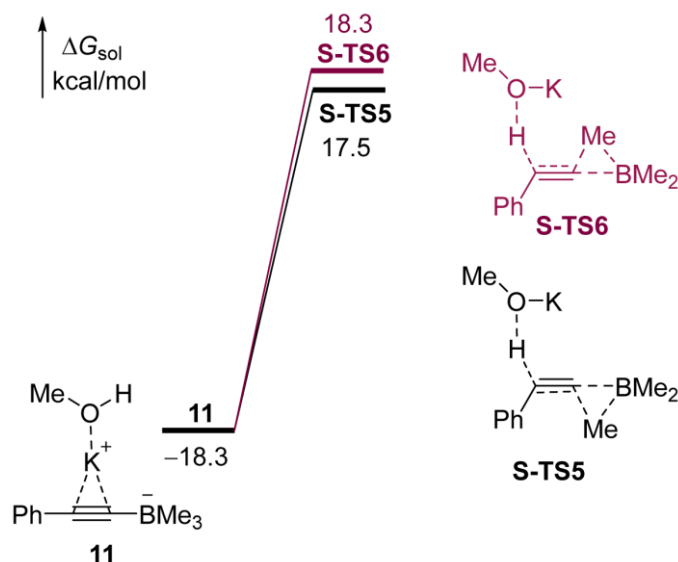

**Fig. S3.** Energy profile of proton-mediated 1,2-migration.

After the formation of alkenyl-Cu intermediate **17**, the Cu–C(sp<sup>2</sup>) protonation has several possible pathways (Fig. S4). The only use of in situ formed MeOH requires the highest barrier (**TS11-b**,  $\Delta G^\ddagger = 24.4$  kcal/mol). The addition of external BMe<sub>3</sub> can lower the barrier (**TS11-a**,  $\Delta G^\ddagger = 16.0$  kcal/mol). The most favorable pathway is the intramolecular boron-assisted Cu–C protonation with a barrier of 9.9 kcal/mol (**TS11**), which is reported in the main text (Fig. 2).

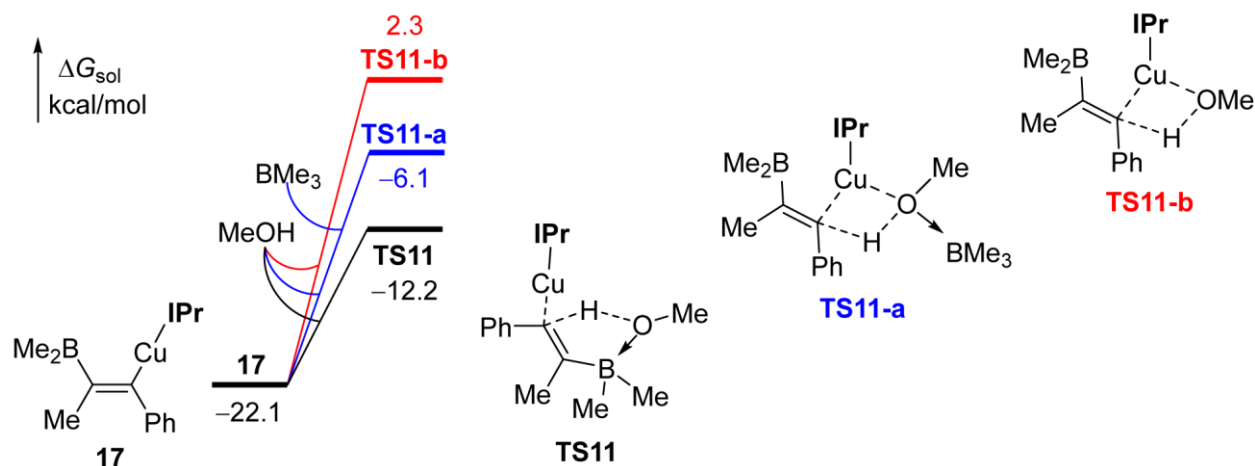

**Fig. S4.** Energy profile of competing Cu–C(sp<sup>2</sup>) protonation pathways.

The competing pathway of CO<sub>2</sub> insertion into alkynyl copper (**14**) was also computed. The transition state (**S-TS7a**) requires a barrier of 12.6 kcal/mol (Fig. S5), which is much higher than the barrierless boron addition (**TS7**,  $\Delta G^\ddagger = 0.8$  kcal/mol). This indicates that CO<sub>2</sub> insertion with alkynyl copper **14** is a less favorable pathway.

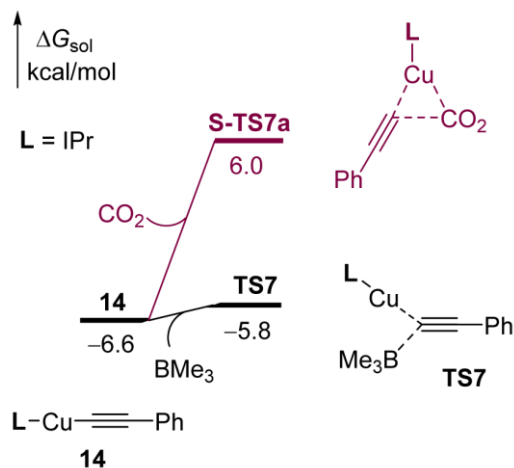

**Fig. S5.** Energy profile of CO<sub>2</sub> insertion into alkynyl copper.

Since BMe<sub>3</sub> can react with Cu–C bond via transmetalation, although it may be unproductive pathways, the transition states of transmetalations between BMe<sub>3</sub> and intermediates **14**, **17**, **19** were computed. As shown in Fig. S6, all these transition states (**S-TS7b**, **S-TS11**, **S-TS13**) are less favorable than their competing pathways (**TS7**, **TS11**, **TS13**) reported in Fig. 2 in the manuscript.

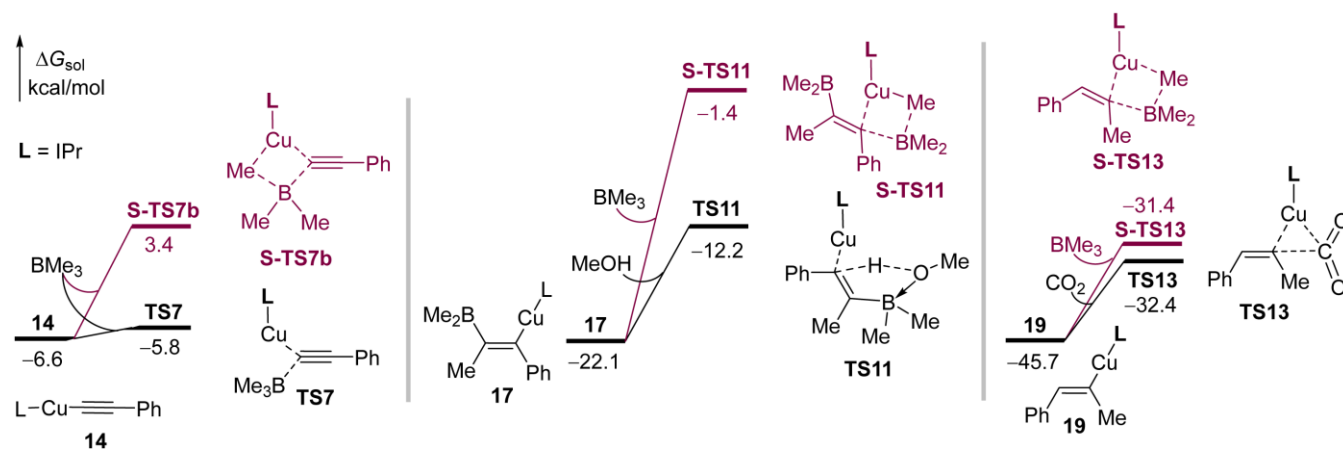

**Fig. S6.** Energy profiles of Cu–C transmetalation with BMe<sub>3</sub> and their competing pathways.

### Comparison of CO<sub>2</sub> Insertion Transition States

Both **TS13** and **TS10** are the transition states for CO<sub>2</sub> insertion into alkenyl copper, but the barriers are not comparable. Although having B···O interactions, **TS10** is higher than **TS13**. The barrier difference for the two CO<sub>2</sub> insertion transition states is mostly due to steric effects. As shown in Fig. S7, **TS10** has shorter O···H distances (2.44 and 2.37 Å) than those in **TS13** (2.53 and 2.45 Å), respectively. Thus, the steric repulsion is much stronger in **TS10**, leading to a higher barrier.

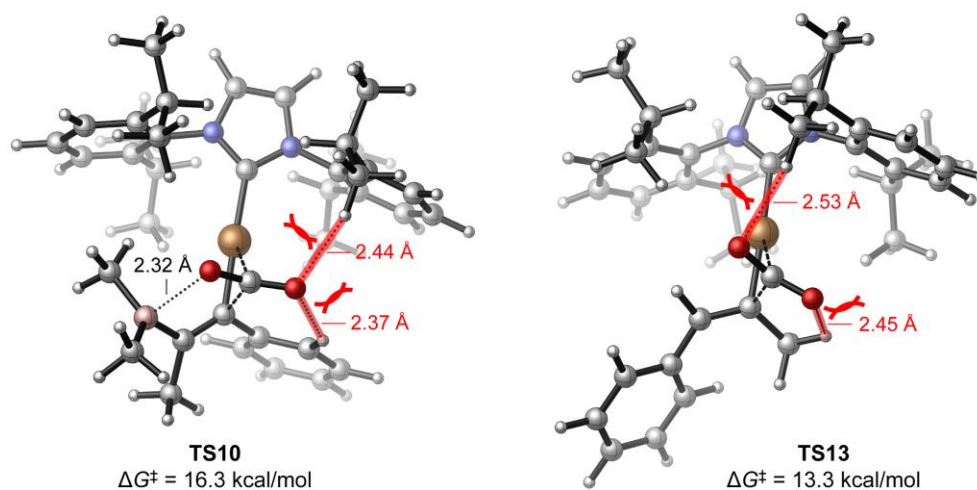

**Fig. S7.** Optimized transition states of CO<sub>2</sub> insertion.

## Charge Density Difference

To understand the change of alkyne  $\pi$  electron density when interacting with the cationic IPrCu, we performed calculations for charge density difference to study the areas of electron gain and loss. As shown in Fig. S8, for the complex **15**, the alkyne  $\pi$  electron is depleted (cyan) at the opposite site of Cu and accumulated (yellow) at the same side of Cu. This unequal redistribution of  $\pi$  electron density leads to different  $\sigma(\pi)$  Pauli repulsion when the migrated alkyl groups approach from different sides of Cu (see the detailed discussions in the main text).

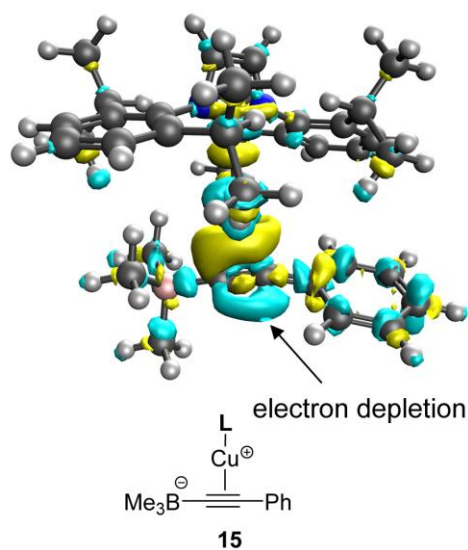

**Fig. S8.** Charge density difference plot (yellow: electron gain; cyan: electron loss) of the complex **15**.

## The in-plane $\pi$ Orbital of L-Cu-alkyne along IRC

To study whether the change of the in-plane  $\pi$  orbital of L-Cu-alkyne fragment has a consistent trend during the reaction process, we computed this orbital for three representative structures along IRC (Fig. S9). The results show that these in-plane  $\pi$  orbitals are accumulated at the same side of Cu and depleted at the opposite side. This indicates the  $\sigma(\pi)$  Pauli repulsion can distinguish the syn- and anti-1,2-migration when the migrated group gradually approaches L-Cu-alkyne from different sides. Thus, the insight of the unequal redistribution of alkyne in-plane  $\pi$  orbitals is solid for explaining the difference of Pauli repulsion.

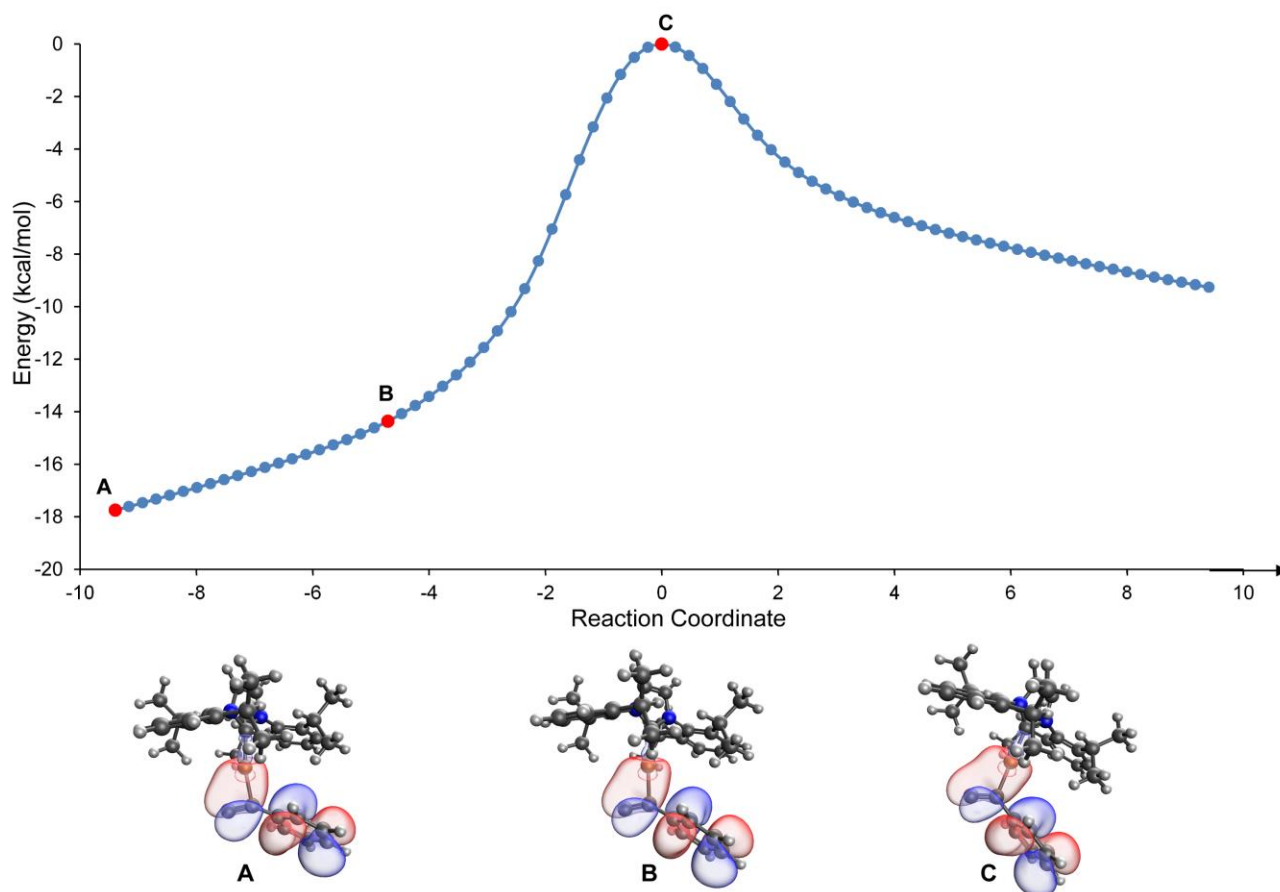

**Fig. S9.** The in-plane  $\pi$  orbital of L-Cu-alkyne fragment along reaction coordinates.



## Energy Terms of EDA along IRC

**Table S2. EDA energy terms of anti-to-metal 1,2-migration (TS8) along IRC**

| Energy terms<br>(in kcal/mol)<br>$r(\text{C-C})$<br>in <b>TS8</b> (in Å) | $\Delta E_{\text{dist}}$ | $\Delta E_{\text{Pauli}}$ | $\Delta E_{\text{ct}}$ | $\Delta E_{\text{elstat}}$ | $\Delta E_{\text{pol}}$ | $\Delta E_{\text{disp}}$ |
|--------------------------------------------------------------------------|--------------------------|---------------------------|------------------------|----------------------------|-------------------------|--------------------------|
| 2.13                                                                     | 60.59                    | 294.84                    | -83.29                 | -158.15                    | -89.40                  | -23.21                   |
| 2.1                                                                      | 62.49                    | 316.99                    | -87.83                 | -167.66                    | -97.47                  | -24.47                   |
| 2.07                                                                     | 64.66                    | 341.28                    | -92.83                 | -177.88                    | -106.67                 | -25.86                   |
| 2.03                                                                     | 67.07                    | 367.87                    | -98.28                 | -188.45                    | -117.54                 | -27.41                   |
| 2.0                                                                      | 69.70                    | 396.69                    | -104.18                | -199.32                    | -130.09                 | -29.12                   |
| 1.97                                                                     | 72.47                    | 428.11                    | -110.51                | -210.58                    | -144.49                 | -31.03                   |
| 1.94(TS)                                                                 | 75.35                    | 461.73                    | -117.28                | -222.0                     | -160.72                 | -33.09                   |
| 1.91                                                                     | 78.43                    | 497.67                    | -124.46                | -233.50                    | -179.09                 | -35.30                   |
| 1.87                                                                     | 81.5                     | 536.17                    | -131.98                | -245.03                    | -199.79                 | -37.67                   |
| 1.84                                                                     | 84.73                    | 576.82                    | -139.76                | -256.59                    | -222.49                 | -40.17                   |

**Table S3. EDA energy terms of syn-to-metal 1,2-migration (TS9) along IRC**

| Energy terms<br>(in kcal/mol)<br>$r(\text{C-C})$<br>in <b>TS9</b> (in Å) | $\Delta E_{\text{dist}}$ | $\Delta E_{\text{Pauli}}$ | $\Delta E_{\text{ct}}$ | $\Delta E_{\text{elstat}}$ | $\Delta E_{\text{pol}}$ | $\Delta E_{\text{disp}}$ |
|--------------------------------------------------------------------------|--------------------------|---------------------------|------------------------|----------------------------|-------------------------|--------------------------|
| 2.12                                                                     | 71.31                    | 327.67                    | -91.18                 | -173.53                    | -104.04                 | -24.97                   |
| 2.09                                                                     | 72.63                    | 345.75                    | -94.94                 | -180.71                    | -111.18                 | -26.02                   |
| 2.06                                                                     | 74.14                    | 367.45                    | -99.31                 | -189.01                    | -120.23                 | -27.30                   |
| 2.03                                                                     | 75.85                    | 390.79                    | -103.99                | -197.75                    | -130.35                 | -28.69                   |
| 2.0(TS)                                                                  | 77.70                    | 417.86                    | -109.26                | -207.22                    | -142.88                 | -30.35                   |
| 1.97                                                                     | 79.73                    | 447.00                    | -114.85                | -217.00                    | -157.00                 | -32.15                   |
| 1.94                                                                     | 81.88                    | 478.90                    | -120.90                | -227.29                    | -173.00                 | -34.15                   |
| 1.91                                                                     | 84.09                    | 513.79                    | -127.37                | -237.82                    | -191.37                 | -36.35                   |
| 1.87                                                                     | 86.35                    | 551.33                    | -134.18                | -248.60                    | -211.88                 | -38.72                   |
| 1.84                                                                     | 88.67                    | 591.27                    | -141.27                | -259.48                    | -234.50                 | -41.23                   |

## Cartesian Coordinates (Å) and Energies of the Optimized Structures

5

B3LYP SCF energy: -1471.36267339 a.u.  
B3LYP enthalpy: -1470.710613 a.u.  
B3LYP free energy: -1470.820964 a.u.  
B3LYP-D3BJ SCF energy in solution: -1473.10854763 a.u.  
B3LYP-D3BJ enthalpy in solution: -1472.456487 a.u.  
B3LYP-D3BJ free energy in solution: -1472.566838 a.u.  
Three lowest frequencies (cm<sup>-1</sup>): 9.3191 16.1521 24.9771

### Cartesian coordinates

| ATOM | X         | Y         | Z         |
|------|-----------|-----------|-----------|
| N    | -1.023914 | 0.000500  | -1.102769 |
| N    | 1.128108  | 0.000477  | -1.051512 |
| C    | 0.031843  | 0.000274  | -0.234011 |
| C    | -0.594066 | 0.001001  | -2.426092 |
| H    | -1.287870 | 0.001301  | -3.252080 |
| C    | 0.762202  | 0.000882  | -2.393486 |
| H    | 1.494681  | 0.001086  | -3.185422 |
| C    | -2.411990 | 0.000408  | -0.701749 |
| C    | -3.061771 | -1.236043 | -0.516348 |
| C    | -3.061722 | 1.236814  | -0.515905 |
| C    | -4.406959 | -1.206164 | -0.128637 |
| C    | -4.406907 | 1.206855  | -0.128198 |
| C    | -5.074447 | 0.000324  | 0.063910  |
| H    | -4.935442 | -2.141365 | 0.031554  |
| H    | -4.935348 | 2.142020  | 0.032338  |
| H    | -6.117589 | 0.000290  | 0.368585  |
| C    | 2.495378  | 0.000254  | -0.583356 |
| C    | 3.134554  | 1.236690  | -0.363974 |
| C    | 3.134488  | -1.236391 | -0.364969 |
| C    | 4.458664  | 1.206416  | 0.090208  |
| C    | 4.458602  | -1.206555 | 0.089231  |
| C    | 5.115705  | -0.000177 | 0.314607  |
| H    | 4.978173  | 2.141462  | 0.278754  |
| H    | 4.978063  | -2.141778 | 0.277024  |
| H    | 6.142092  | -0.000347 | 0.671611  |
| C    | 2.431356  | -2.574544 | -0.570430 |
| C    | 2.188818  | -3.279976 | 0.779131  |
| C    | 3.196993  | -3.485227 | -1.549277 |
| H    | 1.450265  | -2.378511 | -1.013884 |
| H    | 1.601523  | -2.647971 | 1.453654  |
| H    | 1.644297  | -4.219460 | 0.625078  |
| H    | 3.135114  | -3.518499 | 1.278773  |
| H    | 3.346061  | -2.996941 | -2.519250 |
| H    | 4.183539  | -3.761945 | -1.160306 |
| H    | 2.638081  | -4.413096 | -1.717883 |
| C    | -2.348270 | -2.573716 | -0.685659 |
| C    | -3.075521 | -3.497341 | -1.681364 |
| C    | -2.149823 | -3.264946 | 0.678513  |
| H    | -1.352830 | -2.378486 | -1.096230 |
| H    | -3.194674 | -3.018279 | -2.659976 |
| H    | -2.505525 | -4.422921 | -1.822892 |
| H    | -4.072828 | -3.777523 | -1.323613 |
| H    | -1.585113 | -2.624193 | 1.364282  |

|    |           |           |           |
|----|-----------|-----------|-----------|
| H  | -3.111847 | -3.500224 | 1.149067  |
| H  | -1.598271 | -4.204509 | 0.553159  |
| C  | 2.431522  | 2.575045  | -0.568434 |
| C  | 3.197298  | 3.486436  | -1.546515 |
| C  | 2.188901  | 3.279440  | 0.781652  |
| H  | 1.450449  | 2.379428  | -1.012105 |
| H  | 3.346372  | 2.998904  | -2.516866 |
| H  | 2.638489  | 4.414494  | -1.714416 |
| H  | 4.183852  | 3.762743  | -1.157271 |
| H  | 1.601502  | 2.646936  | 1.455617  |
| H  | 3.135155  | 3.517535  | 1.281576  |
| H  | 1.644434  | 4.219065  | 0.628277  |
| C  | -2.348114 | 2.574496  | -0.684689 |
| C  | -2.149340 | 3.265017  | 0.679794  |
| C  | -3.075411 | 3.498694  | -1.679825 |
| H  | -1.352761 | 2.379353  | -1.095518 |
| H  | -1.584576 | 2.623844  | 1.365123  |
| H  | -1.597714 | 4.204588  | 0.554814  |
| H  | -3.111254 | 3.500157  | 1.150645  |
| H  | -3.194837 | 3.020097  | -2.658631 |
| H  | -4.072600 | 3.778880  | -1.321751 |
| H  | -2.505292 | 4.424245  | -1.821045 |
| O  | 0.107600  | -0.001494 | 3.462884  |
| C  | -0.916078 | -0.003938 | 4.404049  |
| H  | -0.496252 | -0.010567 | 5.426759  |
| H  | -1.575896 | 0.885951  | 4.346358  |
| H  | -1.580884 | -0.889430 | 4.336870  |
| Cu | -0.009942 | -0.000530 | 1.670588  |

BMe3

|                                     |                    |         |          |
|-------------------------------------|--------------------|---------|----------|
| B3LYP SCF energy:                   | -144.60911882 a.u. |         |          |
| B3LYP enthalpy:                     | -144.487567 a.u.   |         |          |
| B3LYP free energy:                  | -144.527559 a.u.   |         |          |
| B3LYP-D3BJ SCF energy in solution:  | -144.66924655 a.u. |         |          |
| B3LYP-D3BJ enthalpy in solution:    | -144.547695 a.u.   |         |          |
| B3LYP-D3BJ free energy in solution: | -144.587687 a.u.   |         |          |
| Three lowest frequencies (cm-1):    | 17.9541            | 35.2057 | 111.5987 |

Cartesian coordinates

| ATOM | X         | Y         | Z         |
|------|-----------|-----------|-----------|
| B    | -0.000219 | 0.000000  | -0.000007 |
| C    | 0.963476  | -1.252633 | -0.000158 |
| H    | 2.035057  | -1.023176 | -0.003028 |
| H    | 0.752907  | -1.887418 | 0.874278  |
| H    | 0.748516  | -1.892642 | -0.869555 |
| C    | 0.603414  | 1.460595  | 0.000437  |
| H    | 1.250815  | 1.596360  | -0.879587 |
| H    | -0.130487 | 2.274396  | 0.011001  |
| H    | 1.273095  | 1.591526  | 0.864065  |
| C    | -1.566888 | -0.207863 | -0.000214 |
| H    | -2.010102 | 0.288421  | 0.876826  |
| H    | -2.014091 | 0.302307  | -0.867035 |
| H    | -1.904630 | -1.250366 | -0.007313 |

6

B3LYP SCF energy: -1616.00229489 a.u.  
B3LYP enthalpy: -1615.225552 a.u.  
B3LYP free energy: -1615.348982 a.u.  
B3LYP-D3BJ SCF energy in solution: -1617.81949841 a.u.  
B3LYP-D3BJ enthalpy in solution: -1617.042756 a.u.  
B3LYP-D3BJ free energy in solution: -1617.166186 a.u.  
Three lowest frequencies (cm<sup>-1</sup>): 12.7651 21.1225 22.9333

Cartesian coordinates

| ATOM | X         | Y         | Z         |
|------|-----------|-----------|-----------|
| N    | 1.197997  | -1.297159 | 0.675252  |
| N    | -0.947574 | -1.463599 | 0.598898  |
| C    | 0.082239  | -0.642294 | 0.239056  |
| C    | 0.870678  | -2.499191 | 1.291325  |
| H    | 1.623118  | -3.154414 | 1.701054  |
| C    | -0.481372 | -2.605110 | 1.240264  |
| H    | -1.150362 | -3.373397 | 1.594096  |
| C    | 2.551775  | -0.815701 | 0.513033  |
| C    | 3.285540  | -1.236506 | -0.614608 |
| C    | 3.089276  | 0.037714  | 1.496969  |
| C    | 4.600495  | -0.771828 | -0.738281 |
| C    | 4.409133  | 0.471995  | 1.320120  |
| C    | 5.158420  | 0.073656  | 0.216868  |
| H    | 5.193524  | -1.074104 | -1.596626 |
| H    | 4.853325  | 1.133898  | 2.057657  |
| H    | 6.180144  | 0.424554  | 0.100031  |
| C    | -2.347461 | -1.198672 | 0.345752  |
| C    | -3.132612 | -0.671023 | 1.391393  |
| C    | -2.874791 | -1.501681 | -0.925639 |
| C    | -4.490561 | -0.453663 | 1.128937  |
| C    | -4.237793 | -1.255193 | -1.132223 |
| C    | -5.039155 | -0.739339 | -0.118112 |
| H    | -5.124514 | -0.046768 | 1.910755  |
| H    | -4.675339 | -1.470337 | -2.102642 |
| H    | -6.094220 | -0.555185 | -0.301256 |
| C    | -2.034933 | -2.081647 | -2.059843 |
| C    | -1.992713 | -1.131905 | -3.273174 |
| C    | -2.530374 | -3.483796 | -2.465503 |
| H    | -1.006887 | -2.192115 | -1.702224 |
| H    | -1.614243 | -0.143846 | -2.989924 |
| H    | -1.337919 | -1.541059 | -4.051870 |
| H    | -2.987421 | -0.995778 | -3.712987 |
| H    | -2.524203 | -4.172939 | -1.613194 |
| H    | -3.552519 | -3.451009 | -2.859781 |
| H    | -1.886309 | -3.903587 | -3.247109 |
| C    | 2.704889  | -2.158022 | -1.683218 |
| C    | 3.475564  | -3.490815 | -1.760236 |
| C    | 2.657298  | -1.466122 | -3.059828 |
| H    | 1.673235  | -2.395722 | -1.406198 |
| H    | 3.480299  | -4.007771 | -0.793871 |
| H    | 3.013541  | -4.155841 | -2.499149 |
| H    | 4.518527  | -3.335124 | -2.059328 |
| H    | 2.080953  | -0.535822 | -3.015878 |

|    |           |           |           |
|----|-----------|-----------|-----------|
| H  | 3.662184  | -1.221083 | -3.422444 |
| H  | 2.188124  | -2.125227 | -3.799847 |
| C  | -2.566223 | -0.354986 | 2.773352  |
| C  | -3.061310 | -1.376947 | 3.817553  |
| C  | -2.884158 | 1.084862  | 3.219275  |
| H  | -1.476057 | -0.439889 | 2.721028  |
| H  | -2.791333 | -2.403038 | 3.541430  |
| H  | -2.623322 | -1.163605 | 4.799658  |
| H  | -4.152096 | -1.338020 | 3.921474  |
| H  | -2.533641 | 1.816010  | 2.484601  |
| H  | -3.959858 | 1.237119  | 3.364642  |
| H  | -2.392752 | 1.294432  | 4.176795  |
| C  | 2.304084  | 0.487672  | 2.725218  |
| C  | 2.179755  | 2.022175  | 2.790664  |
| C  | 2.923540  | -0.078312 | 4.018879  |
| H  | 1.288894  | 0.086550  | 2.648496  |
| H  | 1.707815  | 2.422581  | 1.887737  |
| H  | 1.567595  | 2.314203  | 3.651752  |
| H  | 3.158469  | 2.503234  | 2.901146  |
| H  | 2.974743  | -1.173098 | 3.994237  |
| H  | 3.940770  | 0.299392  | 4.174509  |
| H  | 2.323034  | 0.214729  | 4.887857  |
| C  | 0.816856  | 2.790255  | -2.857553 |
| C  | -1.467430 | 3.299895  | 0.248268  |
| H  | -0.774108 | 2.873145  | 0.997153  |
| C  | -1.775117 | 4.482963  | -2.162472 |
| H  | -1.313558 | 4.889824  | -3.075909 |
| B  | -0.709346 | 3.897141  | -1.074774 |
| C  | 0.463550  | 4.960167  | -0.673284 |
| H  | 1.229451  | 4.521224  | -0.011185 |
| H  | 0.997263  | 5.388475  | -1.535960 |
| H  | 0.037083  | 5.816178  | -0.128789 |
| Cu | 0.005914  | 1.028168  | -0.687125 |
| O  | -0.007852 | 2.598273  | -1.723440 |
| H  | 1.072308  | 1.819430  | -3.301293 |
| H  | 0.290010  | 3.385643  | -3.612759 |
| H  | 1.748396  | 3.310401  | -2.594842 |
| H  | -2.215577 | 2.524747  | 0.007080  |
| H  | -2.013938 | 4.099038  | 0.771347  |
| H  | -2.350777 | 5.312810  | -1.725328 |
| H  | -2.509291 | 3.726104  | -2.482874 |

TS1

B3LYP SCF energy: -1615.97521013 a.u.  
 B3LYP enthalpy: -1615.199908 a.u.  
 B3LYP free energy: -1615.319311 a.u.  
 B3LYP-D3BJ SCF energy in solution: -1617.79013027 a.u.  
 B3LYP-D3BJ enthalpy in solution: -1617.014828 a.u.  
 B3LYP-D3BJ free energy in solution: -1617.134231 a.u.  
 Three lowest frequencies (cm<sup>-1</sup>): -256.3473 17.5128 25.8374  
 Imaginary frequency: -256.3473 cm<sup>-1</sup>

Cartesian coordinates

| ATOM | X | Y | Z |
|------|---|---|---|
|------|---|---|---|

|   |           |           |           |
|---|-----------|-----------|-----------|
| N | -1.324224 | 0.606047  | -1.084122 |
| N | 0.810353  | 0.750197  | -1.301104 |
| C | -0.154367 | 0.331375  | -0.426260 |
| C | -1.088647 | 1.182321  | -2.328635 |
| H | -1.893253 | 1.468294  | -2.987233 |
| C | 0.257044  | 1.273194  | -2.464899 |
| H | 0.869388  | 1.655271  | -3.266409 |
| C | -2.651688 | 0.351130  | -0.571919 |
| C | -3.295293 | -0.851456 | -0.930041 |
| C | -3.270344 | 1.335741  | 0.225789  |
| C | -4.600450 | -1.049450 | -0.462575 |
| C | -4.574954 | 1.082318  | 0.666962  |
| C | -5.234866 | -0.095455 | 0.327980  |
| H | -5.126857 | -1.963111 | -0.721329 |
| H | -5.081417 | 1.819293  | 1.282662  |
| H | -6.247710 | -0.270370 | 0.680928  |
| C | 2.234740  | 0.683542  | -1.064288 |
| C | 2.863063  | 1.770348  | -0.423570 |
| C | 2.942532  | -0.449399 | -1.512484 |
| C | 4.247777  | 1.692382  | -0.231278 |
| C | 4.326286  | -0.469893 | -1.298548 |
| C | 4.973769  | 0.586484  | -0.664626 |
| H | 4.762927  | 2.508229  | 0.267451  |
| H | 4.901703  | -1.330022 | -1.627768 |
| H | 6.047736  | 0.546113  | -0.503793 |
| C | 2.267090  | -1.623349 | -2.214270 |
| C | 2.511539  | -2.949865 | -1.469044 |
| C | 2.708803  | -1.716689 | -3.688732 |
| H | 1.187154  | -1.446951 | -2.207487 |
| H | 2.176781  | -2.883280 | -0.428931 |
| H | 1.962546  | -3.761040 | -1.963405 |
| H | 3.573318  | -3.224107 | -1.473609 |
| H | 2.490521  | -0.791521 | -4.235350 |
| H | 3.785803  | -1.904993 | -3.771449 |
| H | 2.187260  | -2.539403 | -4.192088 |
| C | -2.637263 | -1.898415 | -1.824780 |
| C | -3.200196 | -1.826507 | -3.259636 |
| C | -2.770263 | -3.325426 | -1.262396 |
| H | -1.567460 | -1.673676 | -1.876916 |
| H | -3.054233 | -0.834801 | -3.702209 |
| H | -2.702630 | -2.560738 | -3.904209 |
| H | -4.275363 | -2.041716 | -3.270905 |
| H | -2.393025 | -3.385601 | -0.237207 |
| H | -3.810187 | -3.671788 | -1.263285 |
| H | -2.194152 | -4.024600 | -1.879576 |
| C | 2.097965  | 2.996404  | 0.066150  |
| C | 2.625083  | 4.292872  | -0.579300 |
| C | 2.119497  | 3.090331  | 1.604737  |
| H | 1.051911  | 2.888578  | -0.236380 |
| H | 2.585987  | 4.240687  | -1.673459 |
| H | 2.021050  | 5.149470  | -0.257783 |
| H | 3.663413  | 4.494865  | -0.292205 |
| H | 1.701129  | 2.187146  | 2.060845  |
| H | 3.140868  | 3.216304  | 1.982568  |
| H | 1.529514  | 3.951706  | 1.940817  |
| C | -2.591978 | 2.657764  | 0.573385  |

|    |           |           |           |
|----|-----------|-----------|-----------|
| C  | -2.691231 | 2.999754  | 2.071339  |
| C  | -3.159603 | 3.803714  | -0.290043 |
| H  | -1.527758 | 2.562844  | 0.339305  |
| H  | -2.300617 | 2.186754  | 2.691417  |
| H  | -2.108507 | 3.903049  | 2.286283  |
| H  | -3.724079 | 3.197468  | 2.380844  |
| H  | -3.036313 | 3.600908  | -1.359992 |
| H  | -4.229676 | 3.948624  | -0.099006 |
| H  | -2.646554 | 4.745699  | -0.062657 |
| C  | -0.027550 | -3.587758 | 1.631034  |
| C  | 2.624565  | -1.037123 | 2.737078  |
| H  | 2.715688  | -0.484969 | 1.791627  |
| C  | 1.120243  | -2.755592 | 4.236190  |
| H  | 0.114725  | -3.150832 | 4.430945  |
| B  | 1.259323  | -1.876736 | 2.894756  |
| C  | -0.279034 | -0.460791 | 3.398758  |
| H  | -0.740010 | 0.523200  | 3.177023  |
| H  | -1.105033 | -1.109852 | 3.712783  |
| H  | 0.342600  | -0.256200 | 4.273760  |
| Cu | 0.069909  | -0.409182 | 1.358186  |
| O  | 0.934146  | -2.554980 | 1.641752  |
| H  | -0.113724 | -3.964223 | 0.605090  |
| H  | 0.264465  | -4.421858 | 2.282437  |
| H  | -1.017300 | -3.230809 | 1.957886  |
| H  | 3.478866  | -1.732653 | 2.770105  |
| H  | 2.766497  | -0.317040 | 3.553251  |
| H  | 1.423798  | -2.194396 | 5.128471  |
| H  | 1.796547  | -3.622915 | 4.167053  |

BMe2-OMe

B3LYP SCF energy: -219.87217783 a.u.  
 B3LYP enthalpy: -219.742695 a.u.  
 B3LYP free energy: -219.783379 a.u.  
 B3LYP-D3BJ SCF energy in solution: -219.95741005 a.u.  
 B3LYP-D3BJ enthalpy in solution: -219.827927 a.u.  
 B3LYP-D3BJ free energy in solution: -219.868611 a.u.  
 Three lowest frequencies (cm-1): 28.4436 97.7070 120.6810

Cartesian coordinates

| ATOM | X         | Y         | Z         |
|------|-----------|-----------|-----------|
| B    | -0.485156 | -0.001381 | -0.000011 |
| C    | -1.870300 | 0.758600  | 0.000007  |
| H    | -2.470492 | 0.469464  | -0.874849 |
| H    | -2.470211 | 0.469763  | 0.875162  |
| H    | -1.764445 | 1.848241  | -0.000178 |
| C    | -0.382803 | -1.586295 | 0.000002  |
| H    | 0.169909  | -1.954129 | -0.876924 |
| H    | 0.170258  | -1.954188 | 0.876679  |
| H    | -1.362180 | -2.075749 | 0.000171  |
| O    | 0.631745  | 0.784740  | -0.000036 |
| C    | 1.949952  | 0.252726  | 0.000020  |
| H    | 2.646833  | 1.095377  | -0.000399 |
| H    | 2.135628  | -0.359627 | 0.890700  |
| H    | 2.135426  | -0.360354 | -0.890201 |

7

B3LYP SCF energy: -1396.12798418 a.u.  
B3LYP enthalpy: -1395.483137 a.u.  
B3LYP free energy: -1395.590878 a.u.  
B3LYP-D3BJ SCF energy in solution: -1397.84323263 a.u.  
B3LYP-D3BJ enthalpy in solution: -1397.198385 a.u.  
B3LYP-D3BJ free energy in solution: -1397.306126 a.u.  
Three lowest frequencies (cm-1): 8.6707 19.1829 20.3393

Cartesian coordinates

| ATOM | X         | Y         | Z         |
|------|-----------|-----------|-----------|
| N    | -1.074226 | 0.001755  | -0.939305 |
| N    | 1.074173  | 0.001978  | -0.939384 |
| C    | 0.000005  | -0.000581 | -0.093393 |
| C    | -0.678443 | 0.005387  | -2.273163 |
| H    | -1.391802 | 0.007519  | -3.082502 |
| C    | 0.678297  | 0.005564  | -2.273213 |
| H    | 1.391597  | 0.007861  | -3.082603 |
| C    | -2.453818 | 0.002279  | -0.508877 |
| C    | -3.101578 | -1.233357 | -0.312342 |
| C    | -3.098985 | 1.238736  | -0.308606 |
| C    | -4.439637 | -1.202809 | 0.099221  |
| C    | -4.437058 | 1.209814  | 0.102942  |
| C    | -5.102675 | 0.003884  | 0.304855  |
| H    | -4.965772 | -2.137935 | 0.268066  |
| H    | -4.961200 | 2.145520  | 0.274745  |
| H    | -6.140293 | 0.004490  | 0.627933  |
| C    | 2.453769  | 0.002690  | -0.508966 |
| C    | 3.098531  | 1.239222  | -0.307886 |
| C    | 3.101911  | -1.232867 | -0.313185 |
| C    | 4.436588  | 1.210460  | 0.103730  |
| C    | 4.439936  | -1.202161 | 0.098465  |
| C    | 5.102576  | 0.004615  | 0.304914  |
| H    | 4.960424  | 2.146225  | 0.276151  |
| H    | 4.966371  | -2.137221 | 0.266743  |
| H    | 6.140171  | 0.005346  | 0.628061  |
| C    | 2.395003  | -2.571834 | -0.498692 |
| C    | 2.204539  | -3.284127 | 0.855611  |
| C    | 3.125790  | -3.475941 | -1.509769 |
| H    | 1.397375  | -2.376159 | -0.903433 |
| H    | 1.644265  | -2.654079 | 1.554794  |
| H    | 1.653066  | -4.222140 | 0.718214  |
| H    | 3.169266  | -3.526710 | 1.316907  |
| H    | 3.234350  | -2.983771 | -2.483142 |
| H    | 4.128255  | -3.748883 | -1.160739 |
| H    | 2.565082  | -4.405963 | -1.659611 |
| C    | -2.394292 | -2.572226 | -0.497051 |
| C    | -3.124580 | -3.476927 | -1.507955 |
| C    | -2.204055 | -3.283909 | 0.857612  |
| H    | -1.396581 | -2.376492 | -0.901555 |
| H    | -3.232933 | -2.985215 | -2.481583 |
| H    | -2.563649 | -4.406909 | -1.657206 |
| H    | -4.127105 | -3.749892 | -1.159113 |



|    |           |           |           |
|----|-----------|-----------|-----------|
| H  | -1.644190 | -2.653403 | 1.556709  |
| H  | -3.168852 | -3.526612 | 1.318694  |
| H  | -1.652244 | -4.221806 | 0.720767  |
| C  | 2.387813  | 2.576979  | -0.487786 |
| C  | 3.118601  | 3.489503  | -1.491253 |
| C  | 2.190664  | 3.280707  | 0.870045  |
| H  | 1.392108  | 2.380484  | -0.896831 |
| H  | 3.232581  | 3.003076  | -2.466884 |
| H  | 2.554690  | 4.418074  | -1.638023 |
| H  | 4.118707  | 3.764619  | -1.137220 |
| H  | 1.629132  | 2.645301  | 1.563358  |
| H  | 3.153149  | 3.522614  | 1.336361  |
| H  | 1.637630  | 4.218316  | 0.736208  |
| C  | -2.388618 | 2.576589  | -0.489177 |
| C  | -2.191360 | 3.280824  | 0.868383  |
| C  | -3.119779 | 3.488632  | -1.492798 |
| H  | -1.392949 | 2.380173  | -0.898354 |
| H  | -1.629543 | 2.645784  | 1.561796  |
| H  | -1.638577 | 4.218521  | 0.734124  |
| H  | -3.153817 | 3.522644  | 1.334801  |
| H  | -3.233924 | 3.001839  | -2.468228 |
| H  | -4.119835 | 3.763756  | -1.138635 |
| H  | -2.556027 | 4.417224  | -1.640035 |
| C  | 0.000364  | -0.028141 | 3.806267  |
| Cu | 0.000108  | -0.011739 | 1.868266  |
| H  | 0.888951  | 0.473724  | 4.219029  |
| H  | -0.883195 | 0.482254  | 4.219366  |
| H  | -0.004517 | -1.053912 | 4.206371  |

8

B3LYP SCF energy: -308.39359568 a.u.  
 B3LYP enthalpy: -308.276663 a.u.  
 B3LYP free energy: -308.314525 a.u.  
 B3LYP-D3BJ SCF energy in solution: -308.50579102 a.u.  
 B3LYP-D3BJ enthalpy in solution: -308.388858 a.u.  
 B3LYP-D3BJ free energy in solution: -308.426720 a.u.  
 Three lowest frequencies (cm<sup>-1</sup>): 145.6993 158.5995 377.5968

#### Cartesian coordinates

| ATOM | X         | Y         | Z         |
|------|-----------|-----------|-----------|
| C    | -1.512560 | -1.208565 | -0.000007 |
| C    | -0.119960 | -1.213090 | 0.000004  |
| C    | 0.594248  | -0.000023 | 0.000017  |
| C    | -0.119937 | 1.213079  | 0.000006  |
| C    | -1.512522 | 1.208589  | -0.000008 |
| C    | -2.213021 | 0.000015  | -0.000011 |
| H    | -2.053007 | -2.151281 | -0.000011 |
| H    | 0.428540  | -2.149975 | 0.000009  |
| H    | 0.428609  | 2.149937  | 0.000011  |
| H    | -2.052964 | 2.151309  | -0.000013 |
| H    | -3.299617 | 0.000039  | -0.000020 |
| C    | 2.024188  | -0.000018 | 0.000038  |
| C    | 3.234231  | 0.000000  | 0.000001  |
| H    | 4.300438  | 0.000054  | -0.000220 |

TS2

B3LYP SCF energy: -1704.47142912 a.u.  
B3LYP enthalpy: -1703.708660 a.u.  
B3LYP free energy: -1703.829524 a.u.  
B3LYP-D3BJ SCF energy in solution: -1706.31547727 a.u.  
B3LYP-D3BJ enthalpy in solution: -1705.552708 a.u.  
B3LYP-D3BJ free energy in solution: -1705.673572 a.u.  
Three lowest frequencies (cm-1): -347.4256 12.5959 15.8115  
Imaginary frequency: -347.4256 cm-1

Cartesian coordinates

| ATOM | X         | Y         | Z         |
|------|-----------|-----------|-----------|
| C    | -0.805726 | 0.615138  | -0.050844 |
| C    | -1.739182 | 2.679664  | -0.353226 |
| H    | -1.739545 | 3.752221  | -0.467646 |
| C    | -2.751316 | 1.778356  | -0.342697 |
| H    | -3.818018 | 1.903321  | -0.442314 |
| C    | -2.918640 | -0.705391 | -0.095122 |
| C    | -3.309201 | -1.192963 | 1.168310  |
| C    | -4.049694 | -2.381779 | 1.198959  |
| H    | -4.364693 | -2.786518 | 2.156292  |
| C    | -4.390875 | -3.050258 | 0.027130  |
| H    | -4.966156 | -3.971065 | 0.075753  |
| C    | -3.999393 | -2.540425 | -1.208172 |
| H    | -4.275940 | -3.068425 | -2.115784 |
| C    | -3.253641 | -1.358934 | -1.299782 |
| C    | -2.871391 | -0.801122 | -2.668814 |
| H    | -2.129666 | -0.011219 | -2.515213 |
| C    | -4.095342 | -0.162722 | -3.358183 |
| H    | -3.809568 | 0.272539  | -4.323228 |
| H    | -4.534420 | 0.632355  | -2.744979 |
| H    | -4.876826 | -0.909178 | -3.544025 |
| C    | -2.221770 | -1.856509 | -3.583197 |
| H    | -1.342330 | -2.306072 | -3.111695 |
| H    | -1.904338 | -1.389988 | -4.523306 |
| H    | -2.919679 | -2.662015 | -3.838863 |
| C    | -2.995595 | -0.462370 | 2.470550  |
| H    | -2.340424 | 0.381527  | 2.236250  |
| C    | -2.236065 | -1.352173 | 3.472258  |
| H    | -2.827437 | -2.226427 | 3.770429  |
| H    | -2.014800 | -0.779868 | 4.381529  |
| H    | -1.287127 | -1.694707 | 3.046713  |
| C    | -4.283745 | 0.112201  | 3.095267  |
| H    | -4.804391 | 0.781987  | 2.400651  |
| H    | -4.046342 | 0.681108  | 4.002003  |
| H    | -4.982753 | -0.684969 | 3.375339  |
| C    | 0.748843  | 2.558241  | -0.126590 |
| C    | 1.468064  | 2.710851  | -1.329473 |
| C    | 2.733260  | 3.306490  | -1.256029 |
| H    | 3.315267  | 3.434932  | -2.164370 |
| C    | 3.257669  | 3.734392  | -0.039448 |
| H    | 4.242734  | 4.192153  | -0.004279 |
| C    | 2.522471  | 3.576833  | 1.132052  |

|    |           |           |           |
|----|-----------|-----------|-----------|
| H  | 2.941647  | 3.914616  | 2.075441  |
| C  | 1.252221  | 2.986826  | 1.118275  |
| C  | 0.469555  | 2.844144  | 2.420162  |
| H  | -0.467928 | 2.326308  | 2.198427  |
| C  | 0.107755  | 4.224013  | 3.005370  |
| H  | -0.495373 | 4.105786  | 3.913251  |
| H  | -0.467174 | 4.825493  | 2.291540  |
| H  | 1.004999  | 4.794037  | 3.273624  |
| C  | 1.225094  | 1.979771  | 3.447265  |
| H  | 1.416998  | 0.981117  | 3.043518  |
| H  | 0.626291  | 1.871403  | 4.359623  |
| H  | 2.183190  | 2.431467  | 3.730569  |
| C  | 0.918210  | 2.264289  | -2.680745 |
| H  | -0.067065 | 1.818452  | -2.516117 |
| C  | 1.803215  | 1.178417  | -3.322066 |
| H  | 2.813318  | 1.550895  | -3.529274 |
| H  | 1.369285  | 0.846891  | -4.272936 |
| H  | 1.889813  | 0.307632  | -2.664024 |
| C  | 0.726544  | 3.461366  | -3.633130 |
| H  | 0.065055  | 4.218343  | -3.196346 |
| H  | 0.283965  | 3.128676  | -4.579499 |
| H  | 1.681065  | 3.947914  | -3.865342 |
| N  | -0.562169 | 1.957273  | -0.175917 |
| N  | -2.168283 | 0.526496  | -0.162972 |
| Cu | 0.474374  | -0.798766 | 0.337118  |
| C  | 0.860306  | -2.448385 | -1.000285 |
| H  | -0.233234 | -2.499294 | -1.086785 |
| H  | 1.303635  | -2.047610 | -1.914900 |
| H  | 1.228885  | -3.456265 | -0.819728 |
| C  | 1.367670  | -1.659443 | 1.956333  |
| C  | 1.983528  | -2.035034 | 0.874937  |
| C  | 3.275346  | -2.573708 | 0.443201  |
| C  | 3.998760  | -2.030930 | -0.632549 |
| C  | 3.848397  | -3.637705 | 1.163161  |
| C  | 5.255769  | -2.528338 | -0.970840 |
| H  | 3.567152  | -1.208801 | -1.195815 |
| C  | 5.104477  | -4.137920 | 0.820537  |
| H  | 3.293398  | -4.067311 | 1.992399  |
| C  | 5.814343  | -3.585886 | -0.247862 |
| H  | 5.802534  | -2.089175 | -1.801862 |
| H  | 5.527588  | -4.963421 | 1.387775  |
| H  | 6.792253  | -3.976949 | -0.516472 |
| H  | 1.802939  | -1.578043 | 2.951197  |

TS3

B3LYP SCF energy: -1704.47768746 a.u.  
 B3LYP enthalpy: -1703.714292 a.u.  
 B3LYP free energy: -1703.835420 a.u.  
 B3LYP-D3BJ SCF energy in solution: -1706.32096997 a.u.  
 B3LYP-D3BJ enthalpy in solution: -1705.557575 a.u.  
 B3LYP-D3BJ free energy in solution: -1705.678703 a.u.  
 Three lowest frequencies (cm-1): -338.3927 13.1908 19.0667  
 Imaginary frequency: -338.3927 cm-1

Cartesian coordinates

| ATOM | X         | Y         | Z         |
|------|-----------|-----------|-----------|
| C    | -0.742111 | 0.478058  | 0.286419  |
| C    | -1.172489 | 1.879895  | 2.038394  |
| H    | -0.993689 | 2.714258  | 2.697890  |
| C    | -2.165071 | 0.957884  | 2.008709  |
| H    | -3.026617 | 0.817230  | 2.641822  |
| C    | -2.725015 | -1.008033 | 0.568744  |
| C    | -2.353673 | -2.295925 | 1.004955  |
| C    | -3.180774 | -3.365002 | 0.635288  |
| H    | -2.918927 | -4.371256 | 0.949454  |
| C    | -4.331640 | -3.159968 | -0.119079 |
| H    | -4.959237 | -4.004130 | -0.392251 |
| C    | -4.684008 | -1.873969 | -0.520951 |
| H    | -5.588226 | -1.726426 | -1.103639 |
| C    | -3.889588 | -0.769168 | -0.192354 |
| C    | -4.317784 | 0.632900  | -0.621134 |
| H    | -3.466813 | 1.305273  | -0.473000 |
| C    | -5.476225 | 1.144372  | 0.261187  |
| H    | -5.756585 | 2.164666  | -0.026299 |
| H    | -5.204403 | 1.154870  | 1.322507  |
| H    | -6.362624 | 0.508169  | 0.152340  |
| C    | -4.702278 | 0.715154  | -2.110547 |
| H    | -3.892865 | 0.356852  | -2.754304 |
| H    | -4.918534 | 1.755387  | -2.380890 |
| H    | -5.599712 | 0.127657  | -2.335684 |
| C    | -1.130150 | -2.558660 | 1.878940  |
| H    | -0.613345 | -1.608223 | 2.039298  |
| C    | -0.125393 | -3.506557 | 1.196949  |
| H    | -0.571371 | -4.486546 | 0.988794  |
| H    | 0.740989  | -3.666853 | 1.849174  |
| H    | 0.237811  | -3.082331 | 0.255433  |
| C    | -1.549904 | -3.091333 | 3.264203  |
| H    | -2.233983 | -2.400304 | 3.770571  |
| H    | -0.668163 | -3.225000 | 3.901730  |
| H    | -2.054035 | -4.061699 | 3.186147  |
| C    | 0.908545  | 2.293893  | 0.716500  |
| C    | 0.903222  | 3.293845  | -0.276047 |
| C    | 2.102658  | 3.978795  | -0.509492 |
| H    | 2.133269  | 4.752722  | -1.271198 |
| C    | 3.251919  | 3.687370  | 0.219352  |
| H    | 4.171818  | 4.231553  | 0.022432  |
| C    | 3.224938  | 2.701590  | 1.202816  |
| H    | 4.126800  | 2.485603  | 1.767737  |
| C    | 2.056428  | 1.979339  | 1.473758  |
| C    | 2.049101  | 0.925834  | 2.578855  |
| H    | 1.114774  | 0.361850  | 2.501115  |
| C    | 2.074475  | 1.595225  | 3.968956  |
| H    | 2.030993  | 0.836953  | 4.759692  |
| H    | 1.227638  | 2.277397  | 4.106797  |
| H    | 2.994230  | 2.175244  | 4.110385  |
| C    | 3.197045  | -0.089958 | 2.440013  |
| H    | 3.182312  | -0.582525 | 1.463805  |
| H    | 3.105160  | -0.860880 | 3.214285  |
| H    | 4.178583  | 0.381835  | 2.566412  |
| C    | -0.344670 | 3.662212  | -1.072496 |

|    |           |           |           |
|----|-----------|-----------|-----------|
| H  | -1.158285 | 3.004374  | -0.753115 |
| C  | -0.144044 | 3.434247  | -2.582954 |
| H  | 0.648115  | 4.076013  | -2.986273 |
| H  | -1.067872 | 3.664418  | -3.126974 |
| H  | 0.123919  | 2.393029  | -2.789627 |
| C  | -0.784877 | 5.110549  | -0.779894 |
| H  | -0.964817 | 5.265137  | 0.290197  |
| H  | -1.711684 | 5.343470  | -1.317532 |
| H  | -0.025362 | 5.834403  | -1.097639 |
| N  | -0.312235 | 1.572716  | 0.988408  |
| N  | -1.894052 | 0.115183  | 0.933989  |
| Cu | 0.110929  | -0.360136 | -1.249588 |
| C  | -0.948234 | -0.645148 | -3.128159 |
| H  | -1.878607 | -0.555953 | -2.554568 |
| H  | -0.845310 | 0.201979  | -3.810532 |
| H  | -0.988641 | -1.582169 | -3.683793 |
| C  | 1.776395  | -1.447979 | -1.765087 |
| C  | 1.115097  | -1.111395 | -2.818781 |
| H  | 1.237480  | -1.048190 | -3.894488 |
| C  | 3.082397  | -1.973870 | -1.432330 |
| C  | 3.318107  | -3.366131 | -1.425490 |
| C  | 4.158580  | -1.125502 | -1.091147 |
| C  | 4.572290  | -3.880393 | -1.102683 |
| H  | 2.502980  | -4.037927 | -1.681027 |
| C  | 5.410754  | -1.648565 | -0.772489 |
| H  | 3.999402  | -0.050381 | -1.083386 |
| C  | 5.630336  | -3.028727 | -0.773823 |
| H  | 4.724140  | -4.957611 | -1.111161 |
| H  | 6.223411  | -0.969515 | -0.523096 |
| H  | 6.606772  | -3.433069 | -0.520892 |

9

B3LYP SCF energy: -1704.57792271 a.u.  
 B3LYP enthalpy: -1703.810041 a.u.  
 B3LYP free energy: -1703.932446 a.u.  
 B3LYP-D3BJ SCF energy in solution: -1706.41676868 a.u.  
 B3LYP-D3BJ enthalpy in solution: -1705.648887 a.u.  
 B3LYP-D3BJ free energy in solution: -1705.771292 a.u.  
 Three lowest frequencies (cm-1): 9.4054 14.7346 15.2659

#### Cartesian coordinates

| ATOM | X         | Y         | Z         |
|------|-----------|-----------|-----------|
| C    | 1.298356  | -0.227157 | 0.005615  |
| C    | 3.578193  | -0.201308 | 0.063972  |
| H    | 4.557334  | 0.250006  | 0.100166  |
| C    | 3.189948  | -1.500995 | 0.020538  |
| H    | 3.760466  | -2.416497 | 0.011270  |
| C    | 0.989837  | -2.694227 | -0.064991 |
| C    | 0.624686  | -3.210501 | -1.324221 |
| C    | -0.157544 | -4.371957 | -1.342355 |
| H    | -0.464620 | -4.792375 | -2.295565 |
| C    | -0.555825 | -4.991165 | -0.160803 |
| H    | -1.166559 | -5.889189 | -0.198595 |
| C    | -0.178346 | -4.458862 | 1.068962  |

|    |           |           |           |
|----|-----------|-----------|-----------|
| H  | -0.501107 | -4.945834 | 1.984522  |
| C  | 0.603220  | -3.299621 | 1.147294  |
| C  | 0.977103  | -2.726776 | 2.510919  |
| H  | 1.656063  | -1.883360 | 2.351896  |
| C  | 1.726777  | -3.753779 | 3.381221  |
| H  | 2.032946  | -3.294978 | 4.328579  |
| H  | 2.626106  | -4.126237 | 2.877308  |
| H  | 1.097681  | -4.618242 | 3.622384  |
| C  | -0.266677 | -2.177374 | 3.238020  |
| H  | -0.771070 | -1.415230 | 2.634678  |
| H  | 0.020942  | -1.724468 | 4.194502  |
| H  | -0.989979 | -2.973966 | 3.448817  |
| C  | 1.027264  | -2.545872 | -2.636858 |
| H  | 1.671646  | -1.692855 | -2.402774 |
| C  | -0.205538 | -1.991565 | -3.378302 |
| H  | -0.894765 | -2.794347 | -3.665595 |
| H  | 0.103291  | -1.472725 | -4.293717 |
| H  | -0.755895 | -1.283030 | -2.750406 |
| C  | 1.841020  | -3.497463 | -3.534980 |
| H  | 2.734374  | -3.869170 | -3.019995 |
| H  | 2.164348  | -2.976194 | -4.443578 |
| H  | 1.249753  | -4.366373 | -3.846243 |
| C  | 2.393973  | 2.005088  | 0.086669  |
| C  | 2.350940  | 2.652859  | 1.337194  |
| C  | 2.339022  | 4.053190  | 1.337875  |
| H  | 2.297814  | 4.584623  | 2.284289  |
| C  | 2.369229  | 4.774628  | 0.147674  |
| H  | 2.356017  | 5.861001  | 0.171616  |
| C  | 2.410482  | 4.107045  | -1.073302 |
| H  | 2.424958  | 4.679949  | -1.995987 |
| C  | 2.424858  | 2.708130  | -1.134027 |
| C  | 2.438594  | 2.007646  | -2.489413 |
| H  | 2.541394  | 0.931960  | -2.316264 |
| C  | 3.637555  | 2.443802  | -3.353065 |
| H  | 3.653773  | 1.876706  | -4.291072 |
| H  | 4.588343  | 2.272053  | -2.835484 |
| H  | 3.586658  | 3.507329  | -3.612901 |
| C  | 1.104194  | 2.223594  | -3.231289 |
| H  | 0.259429  | 1.866221  | -2.632598 |
| H  | 1.105010  | 1.680419  | -4.183949 |
| H  | 0.938138  | 3.284999  | -3.450312 |
| C  | 2.286033  | 1.892602  | 2.658223  |
| H  | 2.386983  | 0.824678  | 2.441946  |
| C  | 0.916675  | 2.090600  | 3.338576  |
| H  | 0.749078  | 3.142402  | 3.598686  |
| H  | 0.862248  | 1.503407  | 4.263097  |
| H  | 0.101685  | 1.771656  | 2.680043  |
| C  | 3.442678  | 2.276398  | 3.600860  |
| H  | 4.417540  | 2.109211  | 3.128380  |
| H  | 3.400525  | 1.674497  | 4.516109  |
| H  | 3.392433  | 3.330281  | 3.897509  |
| N  | 2.414211  | 0.560146  | 0.054269  |
| N  | 1.799550  | -1.498049 | -0.014487 |
| Cu | -0.571245 | 0.339752  | -0.019748 |
| C  | -2.387314 | 0.949218  | -0.035878 |
| C  | -3.542117 | 0.236412  | -0.006600 |

|   |           |           |           |
|---|-----------|-----------|-----------|
| C | -4.892619 | 0.875944  | -0.025191 |
| C | -6.016912 | 0.244582  | 0.542555  |
| C | -5.105301 | 2.133005  | -0.627182 |
| C | -7.275387 | 0.848630  | 0.540419  |
| H | -5.906240 | -0.729317 | 1.009453  |
| C | -6.359790 | 2.737231  | -0.634990 |
| H | -4.270398 | 2.629884  | -1.112168 |
| C | -7.456742 | 2.100857  | -0.046641 |
| H | -8.117226 | 0.334966  | 0.999651  |
| H | -6.485564 | 3.705652  | -1.114323 |
| H | -8.437317 | 2.570124  | -0.055608 |
| H | -2.541736 | 2.035978  | -0.041160 |
| C | -3.533651 | -1.280818 | 0.074840  |
| H | -4.183804 | -1.738486 | -0.684438 |
| H | -2.516662 | -1.657685 | -0.066603 |
| H | -3.885490 | -1.647054 | 1.050617  |

10

B3LYP SCF energy: -1704.58002369 a.u.  
 B3LYP enthalpy: -1703.812555 a.u.  
 B3LYP free energy: -1703.935946 a.u.  
 B3LYP-D3BJ SCF energy in solution: -1706.42236273 a.u.  
 B3LYP-D3BJ enthalpy in solution: -1705.654894 a.u.  
 B3LYP-D3BJ free energy in solution: -1705.778285 a.u.  
 Three lowest frequencies (cm-1): 7.8994 17.2614 20.0841

Cartesian coordinates

| ATOM | X         | Y         | Z         |
|------|-----------|-----------|-----------|
| C    | -0.620524 | 0.682225  | 0.319357  |
| C    | -0.838709 | 2.617377  | 1.505766  |
| H    | -0.508751 | 3.546207  | 1.943888  |
| C    | -2.048308 | 2.002308  | 1.510934  |
| H    | -2.989922 | 2.283381  | 1.955910  |
| C    | -2.966708 | -0.117558 | 0.548792  |
| C    | -3.117784 | -1.202966 | 1.434494  |
| C    | -4.168142 | -2.095422 | 1.186534  |
| H    | -4.308028 | -2.947467 | 1.845343  |
| C    | -5.030895 | -1.912673 | 0.109515  |
| H    | -5.838470 | -2.618726 | -0.064413 |
| C    | -4.858961 | -0.828988 | -0.747392 |
| H    | -5.534738 | -0.698623 | -1.587765 |
| C    | -3.823961 | 0.093443  | -0.549916 |
| C    | -3.657651 | 1.264090  | -1.514297 |
| H    | -2.800123 | 1.858285  | -1.184358 |
| C    | -4.889097 | 2.191044  | -1.497063 |
| H    | -4.727534 | 3.050159  | -2.158629 |
| H    | -5.091173 | 2.571355  | -0.489097 |
| H    | -5.789715 | 1.670650  | -1.842947 |
| C    | -3.347339 | 0.777392  | -2.943345 |
| H    | -2.447177 | 0.154467  | -2.961869 |
| H    | -3.186185 | 1.634195  | -3.608441 |
| H    | -4.173805 | 0.187042  | -3.355722 |
| C    | -2.187119 | -1.440260 | 2.619749  |
| H    | -1.477752 | -0.608579 | 2.668032  |

|    |           |           |           |
|----|-----------|-----------|-----------|
| C  | -1.363673 | -2.729916 | 2.430555  |
| H  | -2.010848 | -3.613907 | 2.387060  |
| H  | -0.670206 | -2.864001 | 3.269341  |
| H  | -0.779504 | -2.692743 | 1.504760  |
| C  | -2.957802 | -1.458666 | 3.954292  |
| H  | -3.521766 | -0.530912 | 4.105210  |
| H  | -2.260402 | -1.572962 | 4.792300  |
| H  | -3.668354 | -2.292000 | 4.000266  |
| C  | 1.410802  | 2.108412  | 0.538626  |
| C  | 1.753282  | 2.832960  | -0.620448 |
| C  | 3.105783  | 3.141563  | -0.811652 |
| H  | 3.405786  | 3.692428  | -1.698357 |
| C  | 4.071290  | 2.751890  | 0.112652  |
| H  | 5.114989  | 3.004211  | -0.054665 |
| C  | 3.703538  | 2.033258  | 1.246851  |
| H  | 4.466098  | 1.725370  | 1.955998  |
| C  | 2.367271  | 1.688956  | 1.484954  |
| C  | 1.997688  | 0.891703  | 2.731665  |
| H  | 0.940647  | 0.619322  | 2.656789  |
| C  | 2.166339  | 1.742258  | 4.006868  |
| H  | 1.863567  | 1.169776  | 4.891563  |
| H  | 1.557137  | 2.652910  | 3.967672  |
| H  | 3.210411  | 2.046461  | 4.146734  |
| C  | 2.795548  | -0.422970 | 2.829269  |
| H  | 2.693544  | -1.020050 | 1.917721  |
| H  | 2.434299  | -1.018491 | 3.676061  |
| H  | 3.863948  | -0.238152 | 2.990347  |
| C  | 0.723473  | 3.259129  | -1.662247 |
| H  | -0.268959 | 2.984422  | -1.292089 |
| C  | 0.938806  | 2.505418  | -2.990126 |
| H  | 1.914972  | 2.742749  | -3.429097 |
| H  | 0.167258  | 2.785846  | -3.717242 |
| H  | 0.891391  | 1.421611  | -2.839619 |
| C  | 0.721982  | 4.784629  | -1.878987 |
| H  | 0.544394  | 5.323184  | -0.941011 |
| H  | -0.066380 | 5.065325  | -2.587145 |
| H  | 1.674935  | 5.136566  | -2.290473 |
| N  | 0.018300  | 1.800375  | 0.776384  |
| N  | -1.897782 | 0.826811  | 0.783102  |
| Cu | 0.155774  | -0.807198 | -0.679398 |
| C  | -1.046181 | -3.045337 | -2.894056 |
| H  | -1.583488 | -3.984072 | -2.689102 |
| H  | -1.576499 | -2.235332 | -2.379833 |
| H  | -1.128404 | -2.873916 | -3.978387 |
| C  | 1.003809  | -2.303412 | -1.571074 |
| C  | 0.390080  | -3.124346 | -2.450221 |
| H  | 0.958243  | -3.933938 | -2.928366 |
| C  | 2.426336  | -2.582121 | -1.237736 |
| C  | 2.891684  | -3.886519 | -0.967759 |
| C  | 3.370347  | -1.537882 | -1.149401 |
| C  | 4.226666  | -4.134930 | -0.646790 |
| H  | 2.182278  | -4.709559 | -0.998937 |
| C  | 4.707961  | -1.783487 | -0.839297 |
| H  | 3.039208  | -0.519420 | -1.341076 |
| C  | 5.146597  | -3.085601 | -0.583657 |
| H  | 4.549474  | -5.153416 | -0.440078 |



|   |          |           |           |
|---|----------|-----------|-----------|
| H | 5.409586 | -0.953143 | -0.791871 |
| H | 6.186383 | -3.278073 | -0.330710 |

MeOK

|                                     |                    |         |          |
|-------------------------------------|--------------------|---------|----------|
| B3LYP SCF energy:                   | -143.25464514 a.u. |         |          |
| B3LYP enthalpy:                     | -143.210208 a.u.   |         |          |
| B3LYP free energy:                  | -143.243522 a.u.   |         |          |
| B3LYP-D3BJ SCF energy in solution:  | -143.51225879 a.u. |         |          |
| B3LYP-D3BJ enthalpy in solution:    | -143.467822 a.u.   |         |          |
| B3LYP-D3BJ free energy in solution: | -143.501136 a.u.   |         |          |
| Three lowest frequencies (cm-1):    | 95.1828            | 95.6288 | 340.5410 |

Cartesian coordinates

| ATOM | X         | Y         | Z         |
|------|-----------|-----------|-----------|
| C    | 2.199719  | -0.000291 | -0.000002 |
| H    | 2.660890  | 1.021177  | 0.001303  |
| H    | 2.659931  | -0.510542 | -0.885329 |
| H    | 2.659940  | -0.512810 | 0.884008  |
| O    | 0.838964  | 0.000781  | 0.000006  |
| K    | -1.467936 | -0.000122 | -0.000001 |

TS4

|                                     |                    |        |         |
|-------------------------------------|--------------------|--------|---------|
| B3LYP SCF energy:                   | -596.27053861 a.u. |        |         |
| B3LYP enthalpy:                     | -595.985032 a.u.   |        |         |
| B3LYP free energy:                  | -596.057022 a.u.   |        |         |
| B3LYP-D3BJ SCF energy in solution:  | -596.71034904 a.u. |        |         |
| B3LYP-D3BJ enthalpy in solution:    | -596.424842 a.u.   |        |         |
| B3LYP-D3BJ free energy in solution: | -596.496832 a.u.   |        |         |
| Three lowest frequencies (cm-1):    | -171.4810          | 9.3423 | 17.1551 |
| Imaginary frequency:                | -171.4810 cm-1     |        |         |

Cartesian coordinates

| ATOM | X         | Y         | Z         |
|------|-----------|-----------|-----------|
| H    | -1.414611 | 1.020001  | -0.120186 |
| C    | -2.462009 | 3.014773  | 0.204784  |
| O    | -2.732926 | 1.689941  | -0.099007 |
| C    | -0.331474 | 0.533741  | -0.070568 |
| C    | 0.896947  | 0.507051  | -0.097597 |
| C    | -1.921566 | -1.181378 | 1.555087  |
| H    | -2.384972 | -0.188275 | 1.500026  |
| C    | 0.329685  | -2.425334 | 0.670198  |
| H    | 1.060915  | -2.511521 | -0.143066 |
| B    | -0.941855 | -1.525281 | 0.311527  |
| C    | -1.582378 | -1.808799 | -1.153492 |
| H    | -2.037692 | -0.940168 | -1.649306 |
| H    | -0.828792 | -2.176981 | -1.859903 |
| H    | -2.343275 | -2.610204 | -1.083050 |
| H    | -1.388145 | -1.213655 | 2.512793  |
| H    | -2.716470 | -1.949890 | 1.632441  |
| H    | -0.024881 | -3.449122 | 0.881665  |
| H    | 0.862616  | -2.092558 | 1.569612  |
| K    | -4.205304 | -0.213966 | -0.370887 |

|   |           |           |           |
|---|-----------|-----------|-----------|
| H | -1.380074 | 3.192467  | 0.381059  |
| H | -2.756276 | 3.720039  | -0.600495 |
| H | -2.980349 | 3.366826  | 1.122560  |
| C | 2.318359  | 0.402804  | -0.104397 |
| C | 3.055677  | 0.582190  | 1.084267  |
| C | 3.013178  | 0.121206  | -1.298753 |
| C | 4.444333  | 0.480432  | 1.075163  |
| H | 2.522603  | 0.800512  | 2.004324  |
| C | 4.401988  | 0.020315  | -1.300223 |
| H | 2.447691  | -0.015218 | -2.215372 |
| C | 5.121084  | 0.199251  | -0.115066 |
| H | 5.001277  | 0.620115  | 1.997819  |
| H | 4.925973  | -0.197925 | -2.226965 |
| H | 6.204988  | 0.120263  | -0.119090 |

11

B3LYP SCF energy: -596.32665710 a.u.  
 B3LYP enthalpy: -596.035891 a.u.  
 B3LYP free energy: -596.106682 a.u.  
 B3LYP-D3BJ SCF energy in solution: -596.76472000 a.u.  
 B3LYP-D3BJ enthalpy in solution: -596.473954 a.u.  
 B3LYP-D3BJ free energy in solution: -596.544745 a.u.  
 Three lowest frequencies (cm-1): 22.9132 36.1875 41.6024

#### Cartesian coordinates

| ATOM | X         | Y         | Z         |
|------|-----------|-----------|-----------|
| H    | -0.483806 | 1.445057  | 0.743113  |
| C    | -0.939037 | 3.247961  | 1.403341  |
| O    | -0.632348 | 2.332995  | 0.352511  |
| C    | -0.793374 | -0.856454 | 0.299181  |
| C    | 0.412753  | -0.619655 | 0.222325  |
| C    | -3.301766 | 0.075889  | 0.757204  |
| H    | -3.395176 | 0.882111  | 0.000979  |
| C    | -2.525868 | -2.377682 | 1.536909  |
| H    | -1.930638 | -3.280173 | 1.336019  |
| B    | -2.362995 | -1.233316 | 0.364642  |
| C    | -2.839982 | -1.887697 | -1.087424 |
| H    | -2.202465 | -2.724209 | -1.407455 |
| H    | -3.859760 | -2.286385 | -0.988595 |
| H    | -2.898633 | -1.200072 | -1.959699 |
| H    | -2.980220 | 0.571421  | 1.685707  |
| H    | -4.333278 | -0.263281 | 0.928604  |
| H    | -3.575930 | -2.698170 | 1.618994  |
| H    | -2.224677 | -2.013641 | 2.530081  |
| K    | -1.469541 | 0.962954  | -1.792590 |
| H    | -0.117093 | 3.318868  | 2.127451  |
| H    | -1.083834 | 4.230364  | 0.945945  |
| H    | -1.858896 | 2.963705  | 1.929991  |
| C    | 1.838931  | -0.487253 | 0.133940  |
| C    | 2.653807  | -1.638065 | 0.077009  |
| C    | 2.464539  | 0.776809  | 0.088934  |
| C    | 4.038146  | -1.524842 | -0.024713 |
| H    | 2.182101  | -2.615123 | 0.116918  |
| C    | 3.850787  | 0.881476  | -0.013562 |

|   |          |           |           |
|---|----------|-----------|-----------|
| H | 1.849773 | 1.671448  | 0.142107  |
| C | 4.644631 | -0.266272 | -0.072300 |
| H | 4.647623 | -2.424070 | -0.064939 |
| H | 4.313386 | 1.865031  | -0.043881 |
| H | 5.725165 | -0.181670 | -0.150489 |

TS5

|                                     |                    |         |         |
|-------------------------------------|--------------------|---------|---------|
| B3LYP SCF energy:                   | -596.25928509 a.u. |         |         |
| B3LYP enthalpy:                     | -595.970446 a.u.   |         |         |
| B3LYP free energy:                  | -596.047460 a.u.   |         |         |
| B3LYP-D3BJ SCF energy in solution:  | -596.69823926 a.u. |         |         |
| B3LYP-D3BJ enthalpy in solution:    | -596.409400 a.u.   |         |         |
| B3LYP-D3BJ free energy in solution: | -596.486414 a.u.   |         |         |
| Three lowest frequencies (cm-1):    | -444.9912          | 12.1912 | 15.4008 |
| Imaginary frequency:                | -444.9912 cm-1     |         |         |

Cartesian coordinates

| ATOM | X         | Y         | Z         |
|------|-----------|-----------|-----------|
| H    | -5.138069 | -1.561235 | 1.201507  |
| C    | -5.404009 | -1.984772 | -0.693508 |
| O    | -4.571951 | -1.625569 | 0.417382  |
| C    | 0.121212  | 1.003293  | 0.006317  |
| C    | 0.682092  | -0.178133 | 0.092366  |
| C    | -1.413898 | 2.803020  | 1.309905  |
| H    | -0.784730 | 2.605948  | 2.186422  |
| C    | -1.596013 | 2.526376  | -1.418695 |
| H    | -1.080647 | 2.157003  | -2.313647 |
| B    | -0.866885 | 2.122474  | -0.042004 |
| C    | 1.096758  | 2.495069  | -0.202693 |
| H    | 1.655186  | 2.251864  | -1.107002 |
| H    | 0.715534  | 3.518227  | -0.307561 |
| H    | 1.737035  | 2.462434  | 0.679279  |
| H    | -2.419900 | 2.409649  | 1.544466  |
| H    | -1.542209 | 3.891648  | 1.221664  |
| H    | -1.734278 | 3.611743  | -1.529736 |
| H    | -2.615011 | 2.098951  | -1.439418 |
| K    | -1.945996 | -0.934524 | 0.371177  |
| H    | -4.753212 | -2.053179 | -1.568372 |
| H    | -5.884948 | -2.958290 | -0.538039 |
| H    | -6.170720 | -1.224301 | -0.885853 |
| C    | 2.095272  | -0.514649 | 0.023354  |
| C    | 2.877210  | -0.671654 | 1.191191  |
| C    | 2.740956  | -0.748847 | -1.213142 |
| C    | 4.222391  | -1.028295 | 1.124415  |
| H    | 2.407171  | -0.509806 | 2.159002  |
| C    | 4.085697  | -1.108699 | -1.276112 |
| H    | 2.164266  | -0.646420 | -2.129954 |
| C    | 4.841767  | -1.252473 | -0.108981 |
| H    | 4.793606  | -1.133015 | 2.045111  |
| H    | 4.548939  | -1.276475 | -2.246778 |
| H    | 5.889330  | -1.538022 | -0.158988 |

TS6

B3LYP SCF energy: -596.25439349 a.u.  
B3LYP enthalpy: -595.965440 a.u.  
B3LYP free energy: -596.040183 a.u.  
B3LYP-D3BJ SCF energy in solution: -596.69300586 a.u.  
B3LYP-D3BJ enthalpy in solution: -596.404052 a.u.  
B3LYP-D3BJ free energy in solution: -596.478795 a.u.  
Three lowest frequencies (cm-1): -436.7426 13.2018 20.1148  
Imaginary frequency: -436.7426 cm-1

Cartesian coordinates

| ATOM | X         | Y         | Z         |
|------|-----------|-----------|-----------|
| H    | 4.657934  | -2.505827 | 0.000137  |
| C    | 4.673900  | -0.543851 | 0.000031  |
| O    | 3.986893  | -1.807540 | -0.000017 |
| C    | -2.283322 | -0.202362 | 0.000044  |
| C    | -0.991393 | -0.316671 | 0.000034  |
| C    | -4.534432 | 0.328376  | -1.375713 |
| H    | -4.001090 | -0.021178 | -2.268630 |
| C    | -4.534410 | 0.328151  | 1.375931  |
| H    | -4.001073 | -0.021592 | 2.268776  |
| B    | -3.749278 | 0.055856  | 0.000081  |
| C    | -3.196397 | -1.848113 | -0.000122 |
| H    | -2.765847 | -2.278697 | 0.903664  |
| H    | -4.276789 | -2.036630 | -0.000038 |
| H    | -2.766019 | -2.278468 | -0.904099 |
| H    | -4.683151 | 1.411583  | -1.497657 |
| H    | -5.538543 | -0.121476 | -1.382221 |
| H    | -5.538540 | -0.121659 | 1.382365  |
| H    | -4.683081 | 1.411342  | 1.498079  |
| K    | 1.299655  | -1.901612 | -0.000206 |
| H    | 3.913856  | 0.241056  | -0.000062 |
| H    | 5.297318  | -0.431480 | 0.895744  |
| H    | 5.297514  | -0.431519 | -0.895552 |
| C    | -0.014107 | 0.756879  | 0.000063  |
| C    | 0.558716  | 1.245764  | 1.206837  |
| C    | 0.558296  | 1.246215  | -1.206726 |
| C    | 1.621836  | 2.147198  | 1.203288  |
| H    | 0.134870  | 0.910462  | 2.151595  |
| C    | 1.621424  | 2.147637  | -1.203208 |
| H    | 0.134127  | 0.911258  | -2.151460 |
| C    | 2.177075  | 2.602006  | 0.000028  |
| H    | 2.016681  | 2.507614  | 2.151778  |
| H    | 2.015949  | 2.508398  | -2.151701 |
| H    | 3.000573  | 3.311098  | 0.000016  |

12

B3LYP SCF energy: -453.06275761 a.u.  
B3LYP enthalpy: -452.818037 a.u.  
B3LYP free energy: -452.872430 a.u.  
B3LYP-D3BJ SCF energy in solution: -453.23646774 a.u.  
B3LYP-D3BJ enthalpy in solution: -452.991747 a.u.  
B3LYP-D3BJ free energy in solution: -453.046140 a.u.  
Three lowest frequencies (cm-1): 29.8161 46.7325 75.4949

Cartesian coordinates

| ATOM | X         | Y         | Z         |
|------|-----------|-----------|-----------|
| C    | -1.434404 | 0.308212  | 0.149643  |
| C    | -0.372773 | -0.513839 | -0.068162 |
| C    | -3.203887 | -1.807497 | -0.224900 |
| H    | -2.392976 | -2.517653 | -0.033991 |
| C    | -4.113133 | 0.731418  | -0.086844 |
| H    | -3.904792 | 1.681871  | -0.594096 |
| B    | -2.879429 | -0.266558 | -0.054411 |
| C    | -1.272305 | 1.765713  | 0.542529  |
| H    | -2.090532 | 2.084622  | 1.197105  |
| H    | -0.331198 | 1.957508  | 1.067295  |
| H    | -1.303172 | 2.433255  | -0.330891 |
| H    | -0.601384 | -1.559697 | -0.267004 |
| C    | 1.074982  | -0.248362 | -0.060765 |
| C    | 1.657354  | 0.988156  | -0.401214 |
| C    | 1.939718  | -1.313044 | 0.264274  |
| C    | 3.041310  | 1.155416  | -0.386359 |
| H    | 1.027743  | 1.813320  | -0.712843 |
| C    | 3.320785  | -1.142586 | 0.293680  |
| H    | 1.511116  | -2.282729 | 0.507180  |
| C    | 3.878517  | 0.096691  | -0.029789 |
| H    | 3.467695  | 2.116546  | -0.661743 |
| H    | 3.963227  | -1.977637 | 0.560447  |
| H    | 4.956616  | 0.232279  | -0.015945 |
| H    | -3.567346 | -1.986273 | -1.249130 |
| H    | -4.047820 | -2.080864 | 0.425107  |
| H    | -4.368111 | 1.001084  | 0.952204  |
| H    | -5.018899 | 0.295480  | -0.524205 |

13

B3LYP SCF energy: -453.06023846 a.u.  
 B3LYP enthalpy: -452.816221 a.u.  
 B3LYP free energy: -452.871382 a.u.  
 B3LYP-D3BJ SCF energy in solution: -453.23572525 a.u.  
 B3LYP-D3BJ enthalpy in solution: -452.991708 a.u.  
 B3LYP-D3BJ free energy in solution: -453.046869 a.u.  
 Three lowest frequencies (cm-1): 28.7990 41.0558 62.2699

Cartesian coordinates

| ATOM | X        | Y         | Z         |
|------|----------|-----------|-----------|
| H    | 0.292657 | -2.446872 | -0.288486 |
| C    | 1.636799 | -0.847888 | -0.048572 |
| C    | 0.393366 | -1.365415 | -0.165503 |
| C    | 1.556571 | 1.353461  | 1.571216  |
| H    | 2.351552 | 1.121104  | 2.301440  |
| C    | 2.927003 | 1.459758  | -0.778493 |
| H    | 3.296011 | 0.897452  | -1.642648 |
| B    | 1.987565 | 0.660401  | 0.217136  |
| C    | 2.832403 | -1.779640 | -0.162400 |
| H    | 3.470616 | -1.504241 | -1.012682 |
| H    | 3.472695 | -1.734800 | 0.729873  |
| H    | 2.522464 | -2.822410 | -0.295806 |

|   |           |           |           |
|---|-----------|-----------|-----------|
| H | 0.625343  | 0.969471  | 1.998738  |
| H | 1.507177  | 2.447927  | 1.517138  |
| H | 3.792527  | 1.877094  | -0.242410 |
| H | 2.382841  | 2.337577  | -1.159248 |
| C | -0.883063 | -0.636089 | -0.161942 |
| C | -1.001176 | 0.699188  | -0.588838 |
| C | -2.053047 | -1.292161 | 0.266607  |
| C | -2.223948 | 1.366803  | -0.540096 |
| H | -0.133289 | 1.207638  | -1.001561 |
| C | -3.276905 | -0.629607 | 0.311452  |
| H | -1.989329 | -2.331161 | 0.582092  |
| C | -3.367268 | 0.707166  | -0.085725 |
| H | -2.287536 | 2.398388  | -0.876717 |
| H | -4.163263 | -1.156579 | 0.655360  |
| H | -4.322708 | 1.223951  | -0.056993 |

14

B3LYP SCF energy: -1664.04550863 a.u.  
 B3LYP enthalpy: -1663.329987 a.u.  
 B3LYP free energy: -1663.450591 a.u.  
 B3LYP-D3BJ SCF energy in solution: -1665.85987607 a.u.  
 B3LYP-D3BJ enthalpy in solution: -1665.144354 a.u.  
 B3LYP-D3BJ free energy in solution: -1665.264958 a.u.  
 Three lowest frequencies (cm<sup>-1</sup>): 8.8476 9.5577 11.2502

Cartesian coordinates

| ATOM | X        | Y         | Z         |
|------|----------|-----------|-----------|
| N    | 2.090396 | 1.073722  | 0.083719  |
| N    | 2.088541 | -1.076661 | 0.083654  |
| C    | 1.249196 | -0.000742 | 0.032714  |
| C    | 3.420130 | 0.676091  | 0.165791  |
| C    | 3.418957 | -0.681337 | 0.165721  |
| H    | 4.225898 | -1.395553 | 0.214115  |
| C    | 1.656479 | 2.452705  | 0.051367  |
| C    | 1.541130 | 3.094355  | -1.197711 |
| C    | 1.367566 | 3.098849  | 1.269578  |
| C    | 1.120247 | 4.429829  | -1.199481 |
| C    | 0.951653 | 4.434415  | 1.207507  |
| C    | 0.829101 | 5.094903  | -0.011690 |
| H    | 1.011399 | 4.952302  | -2.145300 |
| H    | 0.711978 | 4.960054  | 2.127287  |
| H    | 0.499759 | 6.130145  | -0.036666 |
| C    | 1.652240 | -2.454891 | 0.051332  |
| C    | 1.362484 | -3.100589 | 1.269580  |
| C    | 1.535449 | -3.096259 | -1.197760 |
| C    | 0.944255 | -4.435436 | 1.207542  |
| C    | 1.112254 | -4.430999 | -1.199494 |
| C    | 0.820281 | -5.095642 | -0.011662 |
| H    | 0.703898 | -4.960727 | 2.127347  |
| H    | 1.002225 | -4.953238 | -2.145309 |
| H    | 0.489166 | -6.130320 | -0.036618 |
| C    | 1.814236 | -2.386269 | -2.519241 |
| C    | 0.509453 | -2.174167 | -3.313236 |
| C    | 2.868600 | -3.127991 | -3.363063 |

|    |           |           |           |
|----|-----------|-----------|-----------|
| H  | 2.221479  | -1.395557 | -2.294526 |
| H  | -0.220599 | -1.604748 | -2.728310 |
| H  | 0.712155  | -1.624498 | -4.240280 |
| H  | 0.049156  | -3.131550 | -3.584033 |
| H  | 3.806104  | -3.258348 | -2.810364 |
| H  | 2.520234  | -4.121422 | -3.667695 |
| H  | 3.087941  | -2.562388 | -4.276142 |
| C  | 1.819047  | 2.383975  | -2.519163 |
| C  | 2.874839  | 3.123981  | -3.362712 |
| C  | 0.514093  | 2.174084  | -3.313472 |
| H  | 2.224584  | 1.392569  | -2.294417 |
| H  | 3.812422  | 3.252775  | -2.809783 |
| H  | 3.093463  | 2.558040  | -4.275753 |
| H  | 2.528188  | 4.117993  | -3.667401 |
| H  | -0.217037 | 1.605860  | -2.728731 |
| H  | 0.055438  | 3.132236  | -3.584340 |
| H  | 0.716087  | 1.624109  | -4.240490 |
| C  | 1.458800  | -2.397316 | 2.619680  |
| C  | 2.418867  | -3.125677 | 3.579796  |
| C  | 0.062305  | -2.220102 | 3.249167  |
| H  | 1.866772  | -1.395409 | 2.454263  |
| H  | 3.419837  | -3.228056 | 3.145008  |
| H  | 2.511271  | -2.567369 | 4.518656  |
| H  | 2.059114  | -4.130714 | 3.828210  |
| H  | -0.603978 | -1.664438 | 2.580712  |
| H  | -0.405541 | -3.188632 | 3.461537  |
| H  | 0.138477  | -1.670068 | 4.194858  |
| C  | 1.462425  | 2.395367  | 2.619662  |
| C  | 0.065526  | 2.220610  | 3.248959  |
| C  | 2.423655  | 3.121969  | 3.579953  |
| H  | 1.868605  | 1.392726  | 2.454281  |
| H  | -0.601670 | 1.666213  | 2.580361  |
| H  | 0.140598  | 1.670331  | 4.194597  |
| H  | -0.400625 | 3.189947  | 3.461392  |
| H  | 3.424895  | 3.222496  | 3.145353  |
| H  | 2.065712  | 4.127671  | 3.828290  |
| H  | 2.514848  | 2.563501  | 4.518836  |
| C  | -2.554460 | 0.002026  | -0.100419 |
| C  | -3.785302 | 0.002639  | -0.120452 |
| Cu | -0.679323 | 0.000803  | -0.050574 |
| H  | 4.228301  | 1.388913  | 0.214213  |
| C  | -5.212068 | 0.003300  | -0.140023 |
| C  | -5.923926 | 0.003485  | -1.358954 |
| C  | -5.955268 | 0.003763  | 1.060161  |
| C  | -7.316765 | 0.004100  | -1.373556 |
| H  | -5.364657 | 0.003135  | -2.289956 |
| C  | -7.347942 | 0.004376  | 1.039123  |
| H  | -5.420113 | 0.003628  | 2.005257  |
| C  | -8.037723 | 0.004546  | -0.176340 |
| H  | -7.843414 | 0.004228  | -2.325057 |
| H  | -7.898844 | 0.004722  | 1.976804  |
| H  | -9.124606 | 0.005022  | -0.190381 |

B3LYP SCF energy: -1808.64300236 a.u.  
 B3LYP enthalpy: -1807.805014 a.u.  
 B3LYP free energy: -1807.939185 a.u.  
 B3LYP-D3BJ SCF energy in solution: -1810.53359969 a.u.  
 B3LYP-D3BJ enthalpy in solution: -1809.695611 a.u.  
 B3LYP-D3BJ free energy in solution: -1809.829782 a.u.  
 Three lowest frequencies (cm-1): -147.6535 7.7785 17.2120  
 Imaginary frequency: -147.6535 cm-1

Cartesian coordinates

| ATOM | X         | Y         | Z         |
|------|-----------|-----------|-----------|
| N    | -1.624622 | 1.529144  | 0.852687  |
| N    | -2.211658 | -0.538416 | 0.949108  |
| C    | -1.258919 | 0.285449  | 0.421299  |
| C    | -2.773393 | 1.478465  | 1.633608  |
| H    | -3.210672 | 2.365260  | 2.064522  |
| C    | -3.143812 | 0.174345  | 1.694321  |
| H    | -3.970412 | -0.310867 | 2.188825  |
| C    | -0.910656 | 2.750331  | 0.551346  |
| C    | 0.170321  | 3.123221  | 1.375284  |
| C    | -1.341137 | 3.530149  | -0.541638 |
| C    | 0.827783  | 4.321693  | 1.070504  |
| C    | -0.649802 | 4.721261  | -0.794313 |
| C    | 0.424252  | 5.113678  | -0.000320 |
| H    | 1.668077  | 4.637291  | 1.681961  |
| H    | -0.954565 | 5.347772  | -1.627302 |
| H    | 0.949018  | 6.040093  | -0.217816 |
| C    | -2.255267 | -1.972530 | 0.767279  |
| C    | -3.057776 | -2.495901 | -0.266935 |
| C    | -1.512019 | -2.789526 | 1.642631  |
| C    | -3.101140 | -3.888376 | -0.406687 |
| C    | -1.589296 | -4.174658 | 1.451233  |
| C    | -2.374308 | -4.720552 | 0.439976  |
| H    | -3.707755 | -4.325358 | -1.194292 |
| H    | -1.023864 | -4.833382 | 2.103868  |
| H    | -2.417646 | -5.798371 | 0.309027  |
| C    | -0.651032 | -2.230850 | 2.771582  |
| C    | 0.835977  | -2.590176 | 2.581697  |
| C    | -1.164379 | -2.694093 | 4.149597  |
| H    | -0.724291 | -1.139424 | 2.749410  |
| H    | 1.217411  | -2.215901 | 1.625894  |
| H    | 1.436096  | -2.147721 | 3.385830  |
| H    | 0.992305  | -3.674965 | 2.608165  |
| H    | -2.212027 | -2.411040 | 4.304008  |
| H    | -1.093407 | -3.782373 | 4.260397  |
| H    | -0.568043 | -2.239707 | 4.949469  |
| C    | 0.625533  | 2.297279  | 2.574783  |
| C    | 0.357513  | 3.047663  | 3.895168  |
| C    | 2.105152  | 1.883485  | 2.459078  |
| H    | 0.036893  | 1.375315  | 2.598001  |
| H    | -0.702909 | 3.303109  | 4.004508  |
| H    | 0.648086  | 2.428016  | 4.751643  |
| H    | 0.931721  | 3.980016  | 3.947775  |
| H    | 2.288671  | 1.321238  | 1.538068  |
| H    | 2.770857  | 2.754449  | 2.465108  |
| H    | 2.384698  | 1.249086  | 3.308590  |



|    |           |           |           |
|----|-----------|-----------|-----------|
| C  | -3.876047 | -1.614128 | -1.206347 |
| C  | -5.386438 | -1.774167 | -0.938155 |
| C  | -3.546841 | -1.882496 | -2.687259 |
| H  | -3.617486 | -0.569814 | -1.005574 |
| H  | -5.638707 | -1.537980 | 0.102199  |
| H  | -5.963513 | -1.105533 | -1.587671 |
| H  | -5.718002 | -2.800417 | -1.135462 |
| H  | -2.479273 | -1.751758 | -2.888438 |
| H  | -3.823781 | -2.899671 | -2.987428 |
| H  | -4.104017 | -1.187516 | -3.326462 |
| C  | -2.526272 | 3.138814  | -1.420048 |
| C  | -2.168749 | 3.136471  | -2.918279 |
| C  | -3.738961 | 4.051500  | -1.143919 |
| H  | -2.818861 | 2.116599  | -1.160393 |
| H  | -1.321000 | 2.476237  | -3.124521 |
| H  | -3.025057 | 2.784299  | -3.505366 |
| H  | -1.916054 | 4.140236  | -3.278948 |
| H  | -4.040645 | 4.014756  | -0.090685 |
| H  | -3.511238 | 5.095926  | -1.387625 |
| H  | -4.596817 | 3.743756  | -1.753279 |
| C  | 2.117791  | -0.595758 | -1.171322 |
| C  | 3.305929  | -0.630819 | -0.832143 |
| C  | 0.743501  | -2.595486 | -2.724709 |
| H  | -0.139065 | -2.566871 | -2.068519 |
| C  | 2.761670  | -1.183086 | -3.895607 |
| H  | 3.264893  | -0.208769 | -3.949810 |
| B  | 1.400280  | -1.153750 | -3.035223 |
| C  | 0.370181  | 0.013151  | -3.487345 |
| H  | 0.825010  | 1.013556  | -3.488466 |
| H  | 0.059781  | -0.190837 | -4.526132 |
| H  | -0.562274 | 0.073161  | -2.902134 |
| Cu | 0.342208  | -0.192233 | -0.557602 |
| H  | 2.512678  | -1.466151 | -4.932843 |
| H  | 3.493125  | -1.916543 | -3.533148 |
| H  | 1.455737  | -3.303671 | -2.280916 |
| H  | 0.409151  | -3.039751 | -3.677862 |
| C  | 4.686023  | -0.678576 | -0.480409 |
| C  | 5.518358  | 0.445096  | -0.671952 |
| C  | 5.252811  | -1.850522 | 0.064733  |
| C  | 6.866761  | 0.395590  | -0.328240 |
| H  | 5.088930  | 1.347559  | -1.096266 |
| C  | 6.601926  | -1.892970 | 0.406703  |
| H  | 4.618769  | -2.720098 | 0.208876  |
| C  | 7.413567  | -0.771630 | 0.212530  |
| H  | 7.494932  | 1.268876  | -0.484206 |
| H  | 7.023649  | -2.803865 | 0.823809  |
| H  | 8.466573  | -0.807887 | 0.479248  |

15

B3LYP SCF energy: -1808.65600974 a.u.  
 B3LYP enthalpy: -1807.816805 a.u.  
 B3LYP free energy: -1807.950270 a.u.  
 B3LYP-D3BJ SCF energy in solution: -1810.55478296 a.u.  
 B3LYP-D3BJ enthalpy in solution: -1809.715578 a.u.

B3LYP-D3BJ free energy in solution: -1809.849043 a.u.  
Three lowest frequencies (cm-1): 9.9164 15.7078 18.9959

Cartesian coordinates

| ATOM | X         | Y         | Z         |
|------|-----------|-----------|-----------|
| N    | -0.201581 | -2.000462 | 0.474814  |
| N    | 1.711170  | -1.133614 | 0.947623  |
| C    | 0.524831  | -0.852577 | 0.334177  |
| C    | -1.557918 | -2.186413 | 0.008621  |
| C    | -2.613628 | -1.983313 | 0.921244  |
| C    | -1.767666 | -2.591260 | -1.325175 |
| C    | -3.916736 | -2.195313 | 0.454806  |
| C    | -3.093199 | -2.780817 | -1.737137 |
| C    | -4.156599 | -2.587183 | -0.859588 |
| H    | -4.753662 | -2.048580 | 1.130998  |
| H    | -3.292205 | -3.090788 | -2.758733 |
| H    | -5.176163 | -2.745482 | -1.200916 |
| C    | 2.830616  | -0.224574 | 1.082667  |
| C    | 3.928212  | -0.374250 | 0.209778  |
| C    | 2.797043  | 0.740293  | 2.109286  |
| C    | 5.018027  | 0.483977  | 0.397135  |
| C    | 3.911198  | 1.578221  | 2.239896  |
| C    | 5.010782  | 1.452232  | 1.396957  |
| H    | 5.879609  | 0.399694  | -0.257800 |
| H    | 3.914517  | 2.340011  | 3.013911  |
| H    | 5.863816  | 2.114504  | 1.515763  |
| C    | 1.622810  | 0.895559  | 3.071276  |
| C    | 0.962555  | 2.281257  | 2.934445  |
| C    | 2.048774  | 0.621615  | 4.527373  |
| H    | 0.865111  | 0.150156  | 2.811493  |
| H    | 0.631922  | 2.462084  | 1.906292  |
| H    | 0.089825  | 2.353146  | 3.594468  |
| H    | 1.655922  | 3.084959  | 3.207647  |
| H    | 2.487656  | -0.376955 | 4.635081  |
| H    | 2.790156  | 1.350493  | 4.874172  |
| H    | 1.182137  | 0.686455  | 5.195730  |
| C    | -2.387277 | -1.567439 | 2.372570  |
| C    | -2.795577 | -2.694980 | 3.342395  |
| C    | -3.111977 | -0.252297 | 2.716540  |
| H    | -1.316836 | -1.390296 | 2.514783  |
| H    | -2.250329 | -3.622762 | 3.133933  |
| H    | -2.584664 | -2.402572 | 4.377640  |
| H    | -3.866834 | -2.915968 | 3.269686  |
| H    | -2.807319 | 0.558991  | 2.048711  |
| H    | -4.199993 | -0.355246 | 2.636946  |
| H    | -2.882276 | 0.043102  | 3.747189  |
| C    | 3.974018  | -1.431352 | -0.890609 |
| C    | 4.938362  | -2.575954 | -0.515384 |
| C    | 4.343692  | -0.835093 | -2.262070 |
| H    | 2.972724  | -1.863401 | -0.989010 |
| H    | 4.657349  | -3.052354 | 0.431096  |
| H    | 4.939138  | -3.346309 | -1.295339 |
| H    | 5.964835  | -2.206224 | -0.407795 |
| H    | 3.667057  | -0.022938 | -2.542243 |
| H    | 5.367540  | -0.444087 | -2.272805 |
| H    | 4.283387  | -1.612424 | -3.032914 |

|    |           |           |           |
|----|-----------|-----------|-----------|
| C  | -0.626920 | -2.855544 | -2.303234 |
| C  | -0.740899 | -1.989711 | -3.572117 |
| C  | -0.543923 | -4.354470 | -2.657646 |
| H  | 0.313631  | -2.584626 | -1.814243 |
| H  | -0.752376 | -0.922948 | -3.328747 |
| H  | 0.116721  | -2.172139 | -4.229166 |
| H  | -1.649203 | -2.220268 | -4.141234 |
| H  | -0.414622 | -4.973509 | -1.762199 |
| H  | -1.451411 | -4.694954 | -3.169876 |
| H  | 0.305524  | -4.540079 | -3.325086 |
| C  | -0.322492 | 2.567128  | -1.674234 |
| C  | -1.383129 | 2.385149  | -1.045704 |
| C  | 2.273290  | 3.141426  | -1.557452 |
| H  | 2.547062  | 2.277404  | -0.929864 |
| C  | 0.640146  | 4.211755  | -3.442929 |
| H  | -0.223147 | 4.079141  | -4.111604 |
| B  | 0.995374  | 2.864181  | -2.559769 |
| C  | 1.270556  | 1.571901  | -3.547657 |
| H  | 0.438770  | 1.376853  | -4.242264 |
| H  | 2.163448  | 1.750876  | -4.166418 |
| H  | 1.453685  | 0.627844  | -3.004533 |
| C  | 0.515648  | -2.973087 | 1.159582  |
| H  | 0.103694  | -3.948650 | 1.364077  |
| C  | 1.719549  | -2.424660 | 1.460766  |
| H  | 2.573332  | -2.822401 | 1.985755  |
| Cu | -0.069008 | 0.788050  | -0.534317 |
| H  | 2.103059  | 3.987859  | -0.874275 |
| H  | 3.167553  | 3.388667  | -2.149952 |
| H  | 1.501700  | 4.464782  | -4.080143 |
| H  | 0.434708  | 5.095619  | -2.821072 |
| C  | -2.702081 | 2.509212  | -0.473042 |
| C  | -3.012868 | 3.606668  | 0.354902  |
| C  | -3.709394 | 1.563381  | -0.745087 |
| C  | -4.293011 | 3.753374  | 0.885098  |
| H  | -2.241837 | 4.342024  | 0.563521  |
| C  | -4.988420 | 1.717864  | -0.212625 |
| H  | -3.480029 | 0.714588  | -1.382107 |
| C  | -5.286193 | 2.810974  | 0.604515  |
| H  | -4.517011 | 4.609188  | 1.516610  |
| H  | -5.755113 | 0.981495  | -0.439337 |
| H  | -6.284504 | 2.930006  | 1.017131  |

TS8

B3LYP SCF energy: -1808.63210878 a.u.  
 B3LYP enthalpy: -1807.793623 a.u.  
 B3LYP free energy: -1807.927351 a.u.  
 B3LYP-D3BJ SCF energy in solution: -1810.52163463 a.u.  
 B3LYP-D3BJ enthalpy in solution: -1809.683149 a.u.  
 B3LYP-D3BJ free energy in solution: -1809.816877 a.u.  
 Three lowest frequencies (cm-1): -430.5702 10.4160 18.3724  
 Imaginary frequency: -430.5702 cm-1

Cartesian coordinates

| ATOM | X | Y | Z |
|------|---|---|---|
|------|---|---|---|

|   |           |           |           |
|---|-----------|-----------|-----------|
| N | 0.310665  | -2.332722 | 0.169583  |
| N | -1.668153 | -1.694556 | -0.379618 |
| C | -0.435202 | -1.210033 | -0.049427 |
| C | 1.706525  | -2.328509 | 0.546490  |
| C | 2.680152  | -2.373498 | -0.471231 |
| C | 2.036203  | -2.290774 | 1.916014  |
| C | 4.023915  | -2.384713 | -0.077443 |
| C | 3.395803  | -2.299477 | 2.250903  |
| C | 4.380188  | -2.347707 | 1.267686  |
| H | 4.800648  | -2.414928 | -0.836062 |
| H | 3.686612  | -2.262756 | 3.296830  |
| H | 5.429289  | -2.351831 | 1.550880  |
| C | -2.813175 | -0.872207 | -0.702348 |
| C | -3.693951 | -0.506805 | 0.334741  |
| C | -3.007050 | -0.478326 | -2.041308 |
| C | -4.796451 | 0.286589  | -0.006312 |
| C | -4.126361 | 0.314057  | -2.323931 |
| C | -5.011963 | 0.694423  | -1.319571 |
| H | -5.491092 | 0.595112  | 0.769518  |
| H | -4.301584 | 0.642742  | -3.344153 |
| H | -5.870939 | 1.314712  | -1.560395 |
| C | -2.046408 | -0.859508 | -3.163497 |
| C | -1.310761 | 0.381340  | -3.707195 |
| C | -2.760521 | -1.625836 | -4.293987 |
| H | -1.286390 | -1.529623 | -2.750138 |
| H | -0.768614 | 0.897269  | -2.907557 |
| H | -0.589960 | 0.088320  | -4.480053 |
| H | -2.010826 | 1.096567  | -4.154573 |
| H | -3.263710 | -2.522617 | -3.914671 |
| H | -3.514843 | -1.005016 | -4.790758 |
| H | -2.036581 | -1.938181 | -5.055600 |
| C | 2.324514  | -2.404819 | -1.954412 |
| C | 2.775319  | -3.724317 | -2.611878 |
| C | 2.900341  | -1.185084 | -2.699901 |
| H | 1.235182  | -2.352420 | -2.044774 |
| H | 2.332439  | -4.593618 | -2.112026 |
| H | 2.473849  | -3.747785 | -3.665636 |
| H | 3.864924  | -3.838659 | -2.574893 |
| H | 2.562381  | -0.245340 | -2.251208 |
| H | 3.996311  | -1.185192 | -2.686347 |
| H | 2.581861  | -1.200292 | -3.749229 |
| C | -3.479617 | -0.922525 | 1.786684  |
| C | -4.665808 | -1.746872 | 2.324017  |
| C | -3.199015 | 0.301740  | 2.679970  |
| H | -2.594480 | -1.564626 | 1.830888  |
| H | -4.846041 | -2.637846 | 1.711369  |
| H | -4.465462 | -2.074790 | 3.350693  |
| H | -5.591524 | -1.160325 | 2.339205  |
| H | -2.333276 | 0.866488  | 2.319571  |
| H | -4.055920 | 0.984668  | 2.703828  |
| H | -2.997480 | -0.017314 | 3.709583  |
| C | 0.983754  | -2.219704 | 3.018102  |
| C | 1.046393  | -0.868016 | 3.757331  |
| C | 1.102893  | -3.400230 | 4.001281  |
| H | -0.003759 | -2.286775 | 2.551377  |
| H | 0.912849  | -0.031714 | 3.062919  |

|    |           |           |           |
|----|-----------|-----------|-----------|
| H  | 0.257458  | -0.812524 | 4.516781  |
| H  | 2.009358  | -0.735053 | 4.264311  |
| H  | 1.030502  | -4.363390 | 3.483109  |
| H  | 2.056342  | -3.382976 | 4.541592  |
| H  | 0.300497  | -3.353814 | 4.746691  |
| C  | -0.089507 | 3.237929  | 0.723198  |
| C  | 0.800001  | 2.470537  | 0.150259  |
| C  | -1.314691 | 4.059991  | 2.967181  |
| H  | -0.378834 | 3.841492  | 3.497462  |
| C  | -2.460010 | 4.469555  | 0.493832  |
| H  | -2.252079 | 4.576691  | -0.578532 |
| B  | -1.176077 | 4.025192  | 1.360918  |
| C  | 0.291533  | 5.132901  | 0.870427  |
| H  | 1.224305  | 5.068033  | 1.430673  |
| H  | 0.482853  | 5.324987  | -0.185858 |
| H  | -0.294652 | 5.965287  | 1.273726  |
| C  | -1.688998 | -3.084629 | -0.365716 |
| H  | -2.580053 | -3.645388 | -0.600621 |
| C  | -0.440009 | -3.487417 | -0.018787 |
| H  | -0.017923 | -4.471543 | 0.111419  |
| Cu | 0.158114  | 0.638301  | 0.061290  |
| C  | 2.130385  | 2.837985  | -0.381072 |
| C  | 3.207966  | 3.127545  | 0.477518  |
| C  | 2.372818  | 2.870464  | -1.767662 |
| C  | 4.468421  | 3.446506  | -0.028899 |
| H  | 3.044684  | 3.097902  | 1.551732  |
| C  | 3.631242  | 3.198234  | -2.273725 |
| H  | 1.555381  | 2.644127  | -2.448155 |
| C  | 4.688844  | 3.486252  | -1.407709 |
| H  | 5.281692  | 3.668643  | 0.658526  |
| H  | 3.785989  | 3.227314  | -3.350097 |
| H  | 5.670562  | 3.736462  | -1.801495 |
| H  | -2.051920 | 3.312618  | 3.296403  |
| H  | -1.682935 | 5.032039  | 3.327030  |
| H  | -2.892047 | 5.417386  | 0.847394  |
| H  | -3.251793 | 3.711483  | 0.589818  |

TS9

B3LYP SCF energy: -1808.62839012 a.u.  
 B3LYP enthalpy: -1807.789988 a.u.  
 B3LYP free energy: -1807.923381 a.u.  
 B3LYP-D3BJ SCF energy in solution: -1810.51862535 a.u.  
 B3LYP-D3BJ enthalpy in solution: -1809.680223 a.u.  
 B3LYP-D3BJ free energy in solution: -1809.813616 a.u.  
 Three lowest frequencies (cm<sup>-1</sup>): -313.5435 5.9764 15.2216  
 Imaginary frequency: -313.5435 cm<sup>-1</sup>

Cartesian coordinates

| ATOM | X         | Y         | Z         |
|------|-----------|-----------|-----------|
| N    | -0.321268 | -2.299863 | 0.014729  |
| N    | 1.655696  | -1.631564 | 0.535257  |
| C    | 0.440204  | -1.170202 | 0.116006  |
| C    | -1.708106 | -2.325722 | -0.394407 |
| C    | -2.705277 | -2.306095 | 0.601860  |

|   |           |           |           |
|---|-----------|-----------|-----------|
| C | -2.006648 | -2.387495 | -1.770448 |
| C | -4.039161 | -2.362734 | 0.179396  |
| C | -3.358371 | -2.430478 | -2.134698 |
| C | -4.364856 | -2.422805 | -1.172846 |
| H | -4.832446 | -2.351096 | 0.920932  |
| H | -3.624862 | -2.469954 | -3.186884 |
| H | -5.406971 | -2.459806 | -1.478592 |
| C | 2.812986  | -0.801262 | 0.786548  |
| C | 3.786682  | -0.679010 | -0.226285 |
| C | 2.933647  | -0.167370 | 2.039395  |
| C | 4.911950  | 0.105618  | 0.052703  |
| C | 4.075277  | 0.614424  | 2.257541  |
| C | 5.055737  | 0.748978  | 1.279103  |
| H | 5.682386  | 0.220008  | -0.703881 |
| H | 4.196126  | 1.123634  | 3.209159  |
| H | 5.933840  | 1.359406  | 1.471480  |
| C | 1.889903  | -0.300613 | 3.144286  |
| C | 1.240705  | 1.058430  | 3.472332  |
| C | 2.488033  | -0.952905 | 4.406668  |
| H | 1.094197  | -0.960043 | 2.785138  |
| H | 0.778400  | 1.501371  | 2.583736  |
| H | 0.463272  | 0.933016  | 4.235217  |
| H | 1.977133  | 1.771535  | 3.860743  |
| H | 2.919923  | -1.935611 | 4.184709  |
| H | 3.278364  | -0.332556 | 4.844737  |
| H | 1.711542  | -1.087072 | 5.168747  |
| C | -2.383864 | -2.228941 | 2.091325  |
| C | -2.708637 | -3.559706 | 2.799601  |
| C | -3.102372 | -1.049024 | 2.774324  |
| H | -1.308649 | -2.054624 | 2.197609  |
| H | -2.157174 | -4.397597 | 2.357516  |
| H | -2.444033 | -3.502290 | 3.861949  |
| H | -3.777697 | -3.793359 | 2.732827  |
| H | -2.897374 | -0.103474 | 2.262526  |
| H | -4.189238 | -1.190704 | 2.790325  |
| H | -2.768676 | -0.959248 | 3.814775  |
| C | 3.661293  | -1.375220 | -1.578786 |
| C | 4.647135  | -2.556848 | -1.685764 |
| C | 3.844732  | -0.399792 | -2.756746 |
| H | 2.648791  | -1.783483 | -1.657284 |
| H | 4.488788  | -3.289196 | -0.885753 |
| H | 4.525579  | -3.072588 | -2.645618 |
| H | 5.685749  | -2.212047 | -1.619046 |
| H | 3.156634  | 0.448025  | -2.681937 |
| H | 4.864756  | -0.001447 | -2.801914 |
| H | 3.653395  | -0.916639 | -3.704378 |
| C | -0.931024 | -2.394770 | -2.852424 |
| C | -0.992127 | -1.111548 | -3.704589 |
| C | -1.016950 | -3.656400 | -3.733253 |
| H | 0.046812  | -2.410154 | -2.361360 |
| H | -0.889434 | -0.217837 | -3.079662 |
| H | -0.183450 | -1.107678 | -4.444983 |
| H | -1.942113 | -1.035786 | -4.246354 |
| H | -0.944226 | -4.570393 | -3.132687 |
| H | -1.959640 | -3.697733 | -4.290687 |
| H | -0.200269 | -3.663675 | -4.464384 |

|    |           |           |           |
|----|-----------|-----------|-----------|
| C  | -0.102922 | 3.485072  | -0.894462 |
| C  | -0.781216 | 2.486331  | -0.392075 |
| C  | 1.425016  | 5.658529  | -0.531225 |
| H  | 1.686364  | 5.260737  | 0.458354  |
| C  | 0.412673  | 5.040798  | -3.018070 |
| H  | 0.013403  | 4.238752  | -3.652533 |
| B  | 0.693100  | 4.587663  | -1.494240 |
| C  | 1.742133  | 3.045122  | -1.535451 |
| H  | 1.435412  | 2.254251  | -2.220718 |
| H  | 2.550526  | 3.622933  | -1.999111 |
| H  | 2.099604  | 2.638951  | -0.588967 |
| C  | 1.648493  | -3.012802 | 0.694082  |
| H  | 2.520548  | -3.554962 | 1.024030  |
| C  | 0.401870  | -3.434693 | 0.363305  |
| H  | -0.035559 | -4.420358 | 0.341533  |
| Cu | -0.125013 | 0.665454  | -0.195098 |
| C  | -2.153064 | 2.774367  | 0.120482  |
| C  | -3.211931 | 1.878519  | -0.125017 |
| C  | -2.440615 | 3.928593  | 0.875734  |
| C  | -4.501443 | 2.133273  | 0.343969  |
| H  | -3.014680 | 0.978428  | -0.702636 |
| C  | -3.727179 | 4.178782  | 1.352650  |
| H  | -1.636449 | 4.627628  | 1.087781  |
| C  | -4.767594 | 3.284415  | 1.088836  |
| H  | -5.299249 | 1.425710  | 0.129119  |
| H  | -3.917908 | 5.078515  | 1.933482  |
| H  | -5.769734 | 3.479750  | 1.461990  |
| H  | 1.321813  | 5.428728  | -3.501297 |
| H  | -0.321682 | 5.858548  | -3.037186 |
| H  | 0.769728  | 6.525809  | -0.366294 |
| H  | 2.346661  | 6.050298  | -0.986730 |

16

B3LYP SCF energy: -1808.67023277 a.u.  
 B3LYP enthalpy: -1807.829681 a.u.  
 B3LYP free energy: -1807.963590 a.u.  
 B3LYP-D3BJ SCF energy in solution: -1810.56082394 a.u.  
 B3LYP-D3BJ enthalpy in solution: -1809.720272 a.u.  
 B3LYP-D3BJ free energy in solution: -1809.854181 a.u.  
 Three lowest frequencies (cm-1): 6.0866 15.3474 19.4230

#### Cartesian coordinates

| ATOM | X         | Y         | Z         |
|------|-----------|-----------|-----------|
| N    | 0.927918  | -2.135130 | 0.003429  |
| N    | 2.379186  | -0.608362 | 0.429928  |
| C    | 1.070071  | -0.778005 | 0.077792  |
| C    | -0.300118 | -2.817348 | -0.337874 |
| C    | -1.138457 | -3.258805 | 0.705755  |
| C    | -0.599067 | -3.033637 | -1.698078 |
| C    | -2.302470 | -3.950396 | 0.348666  |
| C    | -1.781635 | -3.722586 | -1.996193 |
| C    | -2.622989 | -4.181007 | -0.986280 |
| H    | -2.969937 | -4.306401 | 1.127757  |
| H    | -2.046412 | -3.901060 | -3.034349 |

|   |           |           |           |
|---|-----------|-----------|-----------|
| H | -3.534044 | -4.716005 | -1.240673 |
| C | 3.019741  | 0.672427  | 0.625669  |
| C | 3.742557  | 1.234354  | -0.446301 |
| C | 2.914784  | 1.297518  | 1.884028  |
| C | 4.374548  | 2.463839  | -0.223837 |
| C | 3.561559  | 2.529202  | 2.046862  |
| C | 4.284945  | 3.107134  | 1.007620  |
| H | 4.939917  | 2.925564  | -1.028165 |
| H | 3.495635  | 3.042269  | 3.001936  |
| H | 4.779384  | 4.063231  | 1.157051  |
| C | 2.134976  | 0.692774  | 3.047514  |
| C | 0.936268  | 1.578463  | 3.440547  |
| C | 3.048478  | 0.418767  | 4.258466  |
| H | 1.730442  | -0.270494 | 2.722535  |
| H | 0.264159  | 1.732436  | 2.589649  |
| H | 0.364631  | 1.104987  | 4.247459  |
| H | 1.264123  | 2.562281  | 3.796425  |
| H | 3.881953  | -0.241315 | 3.991655  |
| H | 3.472962  | 1.345256  | 4.662102  |
| H | 2.477936  | -0.061317 | 5.062076  |
| C | -0.822203 | -3.015376 | 2.178503  |
| C | -0.439004 | -4.328899 | 2.889926  |
| C | -1.982370 | -2.309219 | 2.906437  |
| H | 0.043682  | -2.348473 | 2.234122  |
| H | 0.422284  | -4.810761 | 2.412541  |
| H | -0.181272 | -4.135395 | 3.937880  |
| H | -1.269913 | -5.044101 | 2.876338  |
| H | -2.276857 | -1.389341 | 2.391797  |
| H | -2.868212 | -2.951280 | 2.975975  |
| H | -1.682071 | -2.053942 | 3.929553  |
| C | 3.863919  | 0.553297  | -1.806628 |
| C | 5.306499  | 0.070950  | -2.060436 |
| C | 3.375945  | 1.460915  | -2.952036 |
| H | 3.219854  | -0.331423 | -1.802500 |
| H | 5.644355  | -0.616971 | -1.276802 |
| H | 5.371660  | -0.451787 | -3.021956 |
| H | 6.008535  | 0.912479  | -2.088849 |
| H | 2.344895  | 1.789247  | -2.786679 |
| H | 4.001702  | 2.354686  | -3.056281 |
| H | 3.414785  | 0.918629  | -3.904179 |
| C | 0.295758  | -2.541827 | -2.831680 |
| C | -0.416458 | -1.465550 | -3.674830 |
| C | 0.791210  | -3.706119 | -3.711398 |
| H | 1.179270  | -2.071872 | -2.389208 |
| H | -0.730144 | -0.620645 | -3.052215 |
| H | 0.255677  | -1.086966 | -4.454283 |
| H | -1.307371 | -1.869743 | -4.169752 |
| H | 1.324919  | -4.457701 | -3.118314 |
| H | -0.038600 | -4.210288 | -4.219894 |
| H | 1.474538  | -3.333809 | -4.483526 |
| C | -1.679560 | 3.041677  | -1.108535 |
| C | -1.767816 | 1.840011  | -0.461109 |
| C | -2.621267 | 5.601873  | -1.269042 |
| H | -1.904144 | 5.897697  | -0.492603 |
| C | -4.291871 | 3.566256  | -1.894322 |
| H | -4.444417 | 2.484773  | -1.944481 |



|    |           |           |           |
|----|-----------|-----------|-----------|
| B  | -2.871878 | 4.029731  | -1.359588 |
| C  | -0.329447 | 3.512288  | -1.641192 |
| H  | -0.360053 | 3.743745  | -2.717058 |
| H  | 0.001736  | 4.433504  | -1.140209 |
| H  | 0.444818  | 2.750388  | -1.484483 |
| C  | 3.032597  | -1.827689 | 0.573734  |
| H  | 4.072806  | -1.889764 | 0.852293  |
| C  | 2.116740  | -2.791459 | 0.302307  |
| H  | 2.194724  | -3.867228 | 0.291978  |
| Cu | -0.313731 | 0.572759  | -0.212391 |
| C  | -3.031958 | 1.443784  | 0.205897  |
| C  | -3.592946 | 0.163099  | 0.004365  |
| C  | -3.695610 | 2.295464  | 1.114396  |
| C  | -4.774862 | -0.222625 | 0.633511  |
| H  | -3.092981 | -0.524474 | -0.674555 |
| C  | -4.870703 | 1.904294  | 1.759979  |
| H  | -3.263718 | 3.270767  | 1.325768  |
| C  | -5.423003 | 0.645610  | 1.519308  |
| H  | -5.190330 | -1.208891 | 0.437479  |
| H  | -5.355627 | 2.587426  | 2.454254  |
| H  | -6.337708 | 0.339314  | 2.020594  |
| H  | -4.411599 | 3.973241  | -2.913186 |
| H  | -5.113350 | 4.005636  | -1.311285 |
| H  | -3.542235 | 6.183087  | -1.133958 |
| H  | -2.183226 | 5.935886  | -2.225036 |

17

B3LYP SCF energy: -1808.67005934 a.u.  
 B3LYP enthalpy: -1807.829479 a.u.  
 B3LYP free energy: -1807.961765 a.u.  
 B3LYP-D3BJ SCF energy in solution: -1810.56391556 a.u.  
 B3LYP-D3BJ enthalpy in solution: -1809.723335 a.u.  
 B3LYP-D3BJ free energy in solution: -1809.855621 a.u.  
 Three lowest frequencies (cm<sup>-1</sup>): 14.9390 20.1154 24.1065

#### Cartesian coordinates

| ATOM | X         | Y         | Z         |
|------|-----------|-----------|-----------|
| N    | 0.196455  | -2.135298 | 0.385240  |
| N    | -1.734555 | -1.294474 | 0.816445  |
| C    | -0.526922 | -0.982618 | 0.255624  |
| C    | 1.560517  | -2.305593 | -0.062764 |
| C    | 1.790846  | -2.662078 | -1.406863 |
| C    | 2.603331  | -2.128190 | 0.868151  |
| C    | 3.121201  | -2.834897 | -1.808092 |
| C    | 3.913254  | -2.320985 | 0.412273  |
| C    | 4.172201  | -2.669486 | -0.910034 |
| H    | 3.335631  | -3.102810 | -2.838652 |
| H    | 4.740857  | -2.187050 | 1.102389  |
| H    | 5.197048  | -2.810285 | -1.243137 |
| C    | -2.866445 | -0.399704 | 0.905304  |
| C    | -2.894144 | 0.565560  | 1.931918  |
| C    | -3.916464 | -0.552006 | -0.024376 |
| C    | -4.017258 | 1.399880  | 2.001265  |
| C    | -5.018619 | 0.302367  | 0.100927  |

|   |           |           |           |
|---|-----------|-----------|-----------|
| C | -5.069185 | 1.271775  | 1.099135  |
| H | -4.067497 | 2.157664  | 2.777661  |
| H | -5.844681 | 0.210917  | -0.597994 |
| H | -5.931414 | 1.928931  | 1.173989  |
| C | -3.899926 | -1.610185 | -1.125223 |
| C | -4.157062 | -1.008801 | -2.520036 |
| C | -4.907829 | -2.738194 | -0.822651 |
| H | -2.902131 | -2.058923 | -1.150288 |
| H | -3.447594 | -0.206579 | -2.743321 |
| H | -4.053623 | -1.785905 | -3.286630 |
| H | -5.169517 | -0.597766 | -2.606145 |
| H | -4.704047 | -3.216233 | 0.142339  |
| H | -5.933775 | -2.352853 | -0.791063 |
| H | -4.863016 | -3.510426 | -1.599589 |
| C | 0.664499  | -2.849194 | -2.418588 |
| C | 0.684701  | -4.257635 | -3.043808 |
| C | 0.705481  | -1.754570 | -3.503449 |
| H | -0.288623 | -2.744461 | -1.891372 |
| H | 0.633399  | -5.037813 | -2.275673 |
| H | -0.171489 | -4.385502 | -3.716401 |
| H | 1.593843  | -4.427883 | -3.631873 |
| H | 0.637998  | -0.756443 | -3.057236 |
| H | 1.634272  | -1.802681 | -4.084264 |
| H | -0.132287 | -1.876202 | -4.200603 |
| C | -1.781687 | 0.713243  | 2.965604  |
| C | -2.286357 | 0.352231  | 4.377354  |
| C | -1.157379 | 2.121707  | 2.938754  |
| H | -0.986335 | 0.006111  | 2.714181  |
| H | -2.695067 | -0.664440 | 4.409276  |
| H | -1.465041 | 0.411288  | 5.101107  |
| H | -3.073655 | 1.038407  | 4.710862  |
| H | -0.757677 | 2.357557  | 1.946670  |
| H | -1.889197 | 2.893651  | 3.204996  |
| H | -0.333944 | 2.181714  | 3.660121  |
| C | 2.358159  | -1.738484 | 2.322922  |
| C | 3.022347  | -0.392221 | 2.670350  |
| C | 2.817428  | -2.851866 | 3.285611  |
| H | 1.280534  | -1.612080 | 2.465362  |
| H | 2.675347  | 0.408495  | 2.010695  |
| H | 2.787730  | -0.115281 | 3.705406  |
| H | 4.113004  | -0.444079 | 2.579719  |
| H | 2.316790  | -3.803136 | 3.070070  |
| H | 3.898172  | -3.021956 | 3.215621  |
| H | 2.591148  | -2.575929 | 4.322232  |
| C | 0.457363  | 3.481670  | -1.590758 |
| C | 0.994778  | 2.399572  | -0.939733 |
| C | -1.779444 | 4.926059  | -2.153063 |
| H | -1.490808 | 5.663900  | -1.392878 |
| C | -1.931680 | 2.236355  | -2.289379 |
| H | -1.394016 | 1.281092  | -2.257507 |
| B | -1.050038 | 3.518433  | -1.977467 |
| C | 1.270501  | 4.745373  | -1.881388 |
| H | 0.956633  | 5.587773  | -1.247787 |
| H | 2.343976  | 4.604152  | -1.727361 |
| H | 1.123749  | 5.078829  | -2.918099 |
| C | -1.755559 | -2.602659 | 1.288565  |

|    |           |           |           |
|----|-----------|-----------|-----------|
| H  | -2.624634 | -3.022707 | 1.769649  |
| C  | -0.538490 | -3.134314 | 1.012794  |
| H  | -0.128663 | -4.114308 | 1.200441  |
| Cu | 0.136618  | 0.725285  | -0.437445 |
| C  | 2.382753  | 2.449355  | -0.398698 |
| C  | 2.737882  | 3.301409  | 0.667639  |
| C  | 3.386893  | 1.597283  | -0.902649 |
| C  | 4.029092  | 3.306155  | 1.197481  |
| H  | 1.983629  | 3.969114  | 1.077211  |
| C  | 4.683499  | 1.616869  | -0.388847 |
| H  | 3.137247  | 0.916467  | -1.713180 |
| C  | 5.014231  | 2.467878  | 0.669415  |
| H  | 4.269062  | 3.976158  | 2.020568  |
| H  | 5.437496  | 0.956883  | -0.812494 |
| H  | 6.022333  | 2.477263  | 1.076171  |
| H  | -2.365225 | 2.346953  | -3.297114 |
| H  | -2.793638 | 2.171741  | -1.608940 |
| H  | -2.874662 | 4.860689  | -2.172858 |
| H  | -1.471706 | 5.364569  | -3.116961 |

TS10

B3LYP SCF energy: -1997.23509196 a.u.  
 B3LYP enthalpy: -1996.379217 a.u.  
 B3LYP free energy: -1996.516879 a.u.  
 B3LYP-D3BJ SCF energy in solution: -1999.20600353 a.u.  
 B3LYP-D3BJ enthalpy in solution: -1998.350129 a.u.  
 B3LYP-D3BJ free energy in solution: -1998.487791 a.u.  
 Three lowest frequencies (cm-1): -210.8395 10.1445 16.9415  
 Imaginary frequency: -210.8395 cm-1

Cartesian coordinates

| ATOM | X         | Y         | Z         |
|------|-----------|-----------|-----------|
| N    | 0.514889  | 2.212232  | -0.307571 |
| N    | -1.497688 | 1.655147  | -0.821402 |
| C    | -0.338189 | 1.143512  | -0.309275 |
| C    | 1.889722  | 2.192160  | 0.146239  |
| C    | 2.159970  | 2.489548  | 1.498796  |
| C    | 2.902595  | 1.924035  | -0.795445 |
| C    | 3.501882  | 2.495294  | 1.896422  |
| C    | 4.226577  | 1.943691  | -0.339026 |
| C    | 4.524230  | 2.222361  | 0.991023  |
| H    | 3.750010  | 2.713535  | 2.929860  |
| H    | 5.032742  | 1.736713  | -1.036232 |
| H    | 5.558379  | 2.229074  | 1.324989  |
| C    | -2.731494 | 0.924569  | -1.007665 |
| C    | -2.916221 | 0.199222  | -2.201847 |
| C    | -3.718801 | 1.008698  | -0.005027 |
| C    | -4.137222 | -0.465837 | -2.368274 |
| C    | -4.922130 | 0.328728  | -0.229272 |
| C    | -5.130648 | -0.402350 | -1.395302 |
| H    | -4.310395 | -1.040753 | -3.273444 |
| H    | -5.703264 | 0.368418  | 0.524223  |
| H    | -6.070628 | -0.926424 | -1.545499 |
| C    | -3.529017 | 1.809852  | 1.280304  |

|    |           |           |           |
|----|-----------|-----------|-----------|
| C  | -3.659294 | 0.925134  | 2.535237  |
| C  | -4.502659 | 3.004367  | 1.338374  |
| H  | -2.514033 | 2.218841  | 1.281237  |
| H  | -2.931652 | 0.108263  | 2.526916  |
| H  | -3.487167 | 1.526905  | 3.435696  |
| H  | -4.660971 | 0.487668  | 2.618257  |
| H  | -4.384412 | 3.663773  | 0.470560  |
| H  | -5.546259 | 2.669460  | 1.361163  |
| H  | -4.323284 | 3.597492  | 2.242636  |
| C  | 1.059481  | 2.855489  | 2.492590  |
| C  | 0.907271  | 4.389224  | 2.588015  |
| C  | 1.275794  | 2.250226  | 3.891140  |
| H  | 0.115463  | 2.451486  | 2.111738  |
| H  | 0.671651  | 4.837960  | 1.616695  |
| H  | 0.102103  | 4.651231  | 3.284652  |
| H  | 1.832914  | 4.849878  | 2.953294  |
| H  | 1.424036  | 1.168401  | 3.839154  |
| H  | 2.139018  | 2.694800  | 4.400376  |
| H  | 0.397286  | 2.448258  | 4.516226  |
| C  | -1.853474 | 0.117491  | -3.293126 |
| C  | -2.366184 | 0.692151  | -4.628190 |
| C  | -1.339314 | -1.325034 | -3.466976 |
| H  | -0.999725 | 0.728089  | -2.984398 |
| H  | -2.704271 | 1.728528  | -4.514816 |
| H  | -1.568366 | 0.674721  | -5.379809 |
| H  | -3.205966 | 0.108649  | -5.022797 |
| H  | -0.942411 | -1.717042 | -2.524562 |
| H  | -2.137729 | -1.997357 | -3.802553 |
| H  | -0.538952 | -1.355382 | -4.215725 |
| C  | 2.611915  | 1.665209  | -2.270976 |
| C  | 3.266994  | 0.369295  | -2.781496 |
| C  | 3.037997  | 2.874836  | -3.128877 |
| H  | 1.530557  | 1.545185  | -2.390157 |
| H  | 2.967348  | -0.496370 | -2.184628 |
| H  | 2.971284  | 0.187904  | -3.821922 |
| H  | 4.361123  | 0.429047  | -2.758894 |
| H  | 2.533799  | 3.794576  | -2.809954 |
| H  | 4.118521  | 3.047243  | -3.059116 |
| H  | 2.793172  | 2.701741  | -4.183526 |
| C  | -0.237978 | -3.643754 | 0.852272  |
| C  | 0.564500  | -2.585590 | 0.546631  |
| C  | -2.860550 | -2.841698 | 0.817958  |
| H  | -2.569806 | -1.989094 | 0.193066  |
| C  | -1.929052 | -4.377589 | 2.877844  |
| H  | -2.677943 | -3.916453 | 3.532448  |
| B  | -1.638641 | -3.495957 | 1.585985  |
| C  | 0.157323  | -5.091993 | 0.583459  |
| H  | -0.549893 | -5.571228 | -0.110151 |
| H  | 1.158263  | -5.190704 | 0.155549  |
| H  | 0.117273  | -5.679505 | 1.510145  |
| C  | -1.366166 | 3.001809  | -1.137310 |
| H  | -2.180810 | 3.571687  | -1.555433 |
| C  | -0.097085 | 3.352606  | -0.812616 |
| H  | 0.426721  | 4.291443  | -0.895005 |
| Cu | 0.046556  | -0.704551 | 0.230550  |
| C  | 1.911584  | -2.761909 | -0.073312 |

|   |           |           |           |
|---|-----------|-----------|-----------|
| C | 2.031655  | -3.241734 | -1.395747 |
| C | 3.103424  | -2.439670 | 0.607982  |
| C | 3.278032  | -3.416123 | -1.998829 |
| H | 1.127428  | -3.490323 | -1.946279 |
| C | 4.349012  | -2.613202 | 0.002685  |
| H | 3.042545  | -2.056878 | 1.620642  |
| C | 4.447530  | -3.104552 | -1.301433 |
| H | 3.334389  | -3.798908 | -3.015605 |
| H | 5.250671  | -2.366811 | 0.559138  |
| H | 5.420002  | -3.242114 | -1.767372 |
| H | -1.040816 | -4.607393 | 3.478554  |
| H | -2.353007 | -5.342807 | 2.555016  |
| H | -3.686778 | -2.537941 | 1.472066  |
| H | -3.266399 | -3.600356 | 0.127268  |
| C | 0.235450  | -1.456768 | 2.585149  |
| O | 1.316600  | -1.099206 | 2.937301  |
| O | -0.934580 | -1.642947 | 2.799031  |

TS11

B3LYP SCF energy: -1924.38770845 a.u.  
 B3LYP enthalpy: -1923.493946 a.u.  
 B3LYP free energy: -1923.630893 a.u.  
 B3LYP-D3BJ SCF energy in solution: -1926.33843140 a.u.  
 B3LYP-D3BJ enthalpy in solution: -1925.444669 a.u.  
 B3LYP-D3BJ free energy in solution: -1925.581616 a.u.  
 Three lowest frequencies (cm-1): -1077.0263 13.0344 16.5849  
 Imaginary frequency: -1077.0263 cm-1

Cartesian coordinates

| ATOM | X         | Y         | Z         |
|------|-----------|-----------|-----------|
| N    | -1.171615 | -2.036837 | -0.358858 |
| N    | 0.899909  | -2.132492 | 0.212645  |
| C    | -0.106427 | -1.242364 | -0.042428 |
| C    | -0.836162 | -3.384262 | -0.302448 |
| H    | -1.553080 | -4.159055 | -0.523655 |
| C    | 0.469484  | -3.445015 | 0.059885  |
| H    | 1.126918  | -4.284285 | 0.222912  |
| C    | -2.497081 | -1.575541 | -0.710722 |
| C    | -3.477722 | -1.512433 | 0.299285  |
| C    | -2.767465 | -1.259662 | -2.057116 |
| C    | -4.769574 | -1.130603 | -0.081841 |
| C    | -4.075110 | -0.875805 | -2.377755 |
| C    | -5.067939 | -0.816674 | -1.404315 |
| H    | -5.549072 | -1.067312 | 0.671607  |
| H    | -4.316542 | -0.616905 | -3.404597 |
| H    | -6.075869 | -0.515101 | -1.675678 |
| C    | 2.249307  | -1.781074 | 0.596090  |
| C    | 3.235666  | -1.701309 | -0.407507 |
| C    | 2.531698  | -1.570398 | 1.960502  |
| C    | 4.540239  | -1.391288 | -0.004876 |
| C    | 3.853499  | -1.261343 | 2.304417  |
| C    | 4.847840  | -1.170978 | 1.334633  |
| H    | 5.324037  | -1.317199 | -0.752661 |
| H    | 4.105871  | -1.090717 | 3.347084  |

|   |           |           |           |
|---|-----------|-----------|-----------|
| H | 5.866968  | -0.928804 | 1.623836  |
| C | 1.472212  | -1.681760 | 3.052518  |
| C | 1.314873  | -0.359568 | 3.826998  |
| C | 1.773357  | -2.854604 | 4.006731  |
| H | 0.510063  | -1.889516 | 2.575112  |
| H | 1.068976  | 0.463564  | 3.148145  |
| H | 0.509835  | -0.446805 | 4.566296  |
| H | 2.232404  | -0.093044 | 4.364442  |
| H | 1.845353  | -3.803838 | 3.463548  |
| H | 2.718474  | -2.704604 | 4.541519  |
| H | 0.978458  | -2.951216 | 4.755597  |
| C | -3.183998 | -1.836034 | 1.761111  |
| C | -3.936018 | -3.102755 | 2.216174  |
| C | -3.497686 | -0.640066 | 2.681828  |
| H | -2.113083 | -2.041214 | 1.856384  |
| H | -3.676466 | -3.970488 | 1.598230  |
| H | -3.688113 | -3.341044 | 3.257253  |
| H | -5.021867 | -2.964753 | 2.155448  |
| H | -2.957819 | 0.258650  | 2.367376  |
| H | -4.568750 | -0.406312 | 2.685666  |
| H | -3.210123 | -0.878717 | 3.713315  |
| C | 2.936475  | -1.965506 | -1.880050 |
| C | 3.557543  | -3.302383 | -2.334854 |
| C | 3.395315  | -0.807298 | -2.784956 |
| H | 1.851630  | -2.052437 | -1.996026 |
| H | 3.198277  | -4.141904 | -1.728340 |
| H | 3.302942  | -3.506359 | -3.381546 |
| H | 4.650698  | -3.278538 | -2.254264 |
| H | 2.953728  | 0.144111  | -2.474060 |
| H | 4.484827  | -0.688501 | -2.772407 |
| H | 3.098725  | -1.004816 | -3.822135 |
| C | -1.704115 | -1.308754 | -3.149744 |
| C | -1.431461 | 0.096125  | -3.722785 |
| C | -2.077544 | -2.304201 | -4.265579 |
| H | -0.769957 | -1.661192 | -2.702032 |
| H | -1.129685 | 0.792261  | -2.933096 |
| H | -0.629861 | 0.052579  | -4.469925 |
| H | -2.322368 | 0.508754  | -4.210246 |
| H | -2.235625 | -3.312796 | -3.866523 |
| H | -2.995011 | -2.003738 | -4.784519 |
| H | -1.276377 | -2.355183 | -5.012137 |
| C | -0.750883 | 3.616345  | -0.206147 |
| C | 0.224955  | 2.679080  | 0.008827  |
| C | -2.669123 | 4.821973  | 1.334768  |
| H | -1.912538 | 5.431279  | 1.851116  |
| C | -3.282177 | 2.596544  | -0.079863 |
| H | -2.933927 | 1.609932  | -0.416911 |
| B | -2.120593 | 3.442347  | 0.673286  |
| C | -0.581960 | 4.850515  | -1.061541 |
| H | -0.856252 | 5.750754  | -0.497435 |
| H | 0.428527  | 4.985338  | -1.460068 |
| H | -1.276117 | 4.810898  | -1.914657 |
| O | -1.536267 | 2.433671  | 1.845157  |
| H | -0.501898 | 2.281972  | 1.276990  |
| C | -1.297682 | 2.934903  | 3.156197  |
| H | -0.597159 | 3.779877  | 3.146017  |

|    |           |          |           |
|----|-----------|----------|-----------|
| H  | -2.241324 | 3.265187 | 3.597070  |
| H  | -0.879390 | 2.127948 | 3.769158  |
| Cu | -0.027196 | 0.698832 | 0.059340  |
| C  | 1.627174  | 2.800229 | -0.484117 |
| C  | 2.707195  | 2.765391 | 0.422308  |
| C  | 1.945577  | 2.939200 | -1.852215 |
| C  | 4.027562  | 2.894552 | -0.007188 |
| H  | 2.492851  | 2.648186 | 1.482266  |
| C  | 3.267088  | 3.067118 | -2.285317 |
| H  | 1.138199  | 2.947817 | -2.579855 |
| C  | 4.317947  | 3.048920 | -1.365496 |
| H  | 4.833894  | 2.876970 | 0.722763  |
| H  | 3.475074  | 3.182598 | -3.346997 |
| H  | 5.346652  | 3.151230 | -1.701564 |
| H  | -3.636205 | 3.129957 | -0.975391 |
| H  | -4.163628 | 2.431966 | 0.557814  |
| H  | -3.488237 | 4.647123 | 2.048081  |
| H  | -3.092590 | 5.460240 | 0.546149  |

18

B3LYP SCF energy: -1924.45011553 a.u.  
 B3LYP enthalpy: -1923.550648 a.u.  
 B3LYP free energy: -1923.690438 a.u.  
 B3LYP-D3BJ SCF energy in solution: -1926.39082967 a.u.  
 B3LYP-D3BJ enthalpy in solution: -1925.491362 a.u.  
 B3LYP-D3BJ free energy in solution: -1925.631152 a.u.  
 Three lowest frequencies (cm-1): 10.9097 14.1454 18.6301

#### Cartesian coordinates

| ATOM | X        | Y         | Z         |
|------|----------|-----------|-----------|
| N    | 2.879754 | -0.877144 | -0.409760 |
| N    | 2.693983 | 1.268325  | -0.409112 |
| C    | 1.988529 | 0.125807  | -0.160223 |
| C    | 4.112401 | -0.368931 | -0.802142 |
| H    | 4.944718 | -1.012754 | -1.038531 |
| C    | 3.995340 | 0.983240  | -0.803835 |
| H    | 4.703070 | 1.760695  | -1.044836 |
| C    | 2.599326 | -2.291545 | -0.285398 |
| C    | 2.711016 | -2.894039 | 0.983688  |
| C    | 2.253700 | -3.013221 | -1.446038 |
| C    | 2.455053 | -4.268312 | 1.067387  |
| C    | 2.020466 | -4.386176 | -1.302918 |
| C    | 2.115772 | -5.008331 | -0.061307 |
| H    | 2.523723 | -4.764304 | 2.031153  |
| H    | 1.751695 | -4.974122 | -2.175195 |
| H    | 1.921627 | -6.073686 | 0.027226  |
| C    | 2.158972 | 2.605029  | -0.275753 |
| C    | 1.498824 | 3.182705  | -1.378837 |
| C    | 2.327545 | 3.278333  | 0.951074  |
| C    | 0.990800 | 4.478069  | -1.218004 |
| C    | 1.800500 | 4.571619  | 1.053405  |
| C    | 1.138015 | 5.166492  | -0.017046 |
| H    | 0.470673 | 4.951694  | -2.045387 |
| H    | 1.908319 | 5.118523  | 1.985710  |

|   |           |           |           |
|---|-----------|-----------|-----------|
| H | 0.734486  | 6.170166  | 0.085427  |
| C | 3.044521  | 2.655788  | 2.145546  |
| C | 2.092396  | 2.480289  | 3.345031  |
| C | 4.293023  | 3.468205  | 2.541585  |
| H | 3.386175  | 1.657072  | 1.856658  |
| H | 1.229388  | 1.861100  | 3.078130  |
| H | 2.616059  | 1.996303  | 4.177818  |
| H | 1.715624  | 3.444922  | 3.704151  |
| H | 4.990405  | 3.566064  | 1.701838  |
| H | 4.027569  | 4.478575  | 2.873152  |
| H | 4.820652  | 2.975998  | 3.366726  |
| C | 3.097303  | -2.120505 | 2.240681  |
| C | 4.411697  | -2.651198 | 2.846566  |
| C | 1.959188  | -2.131480 | 3.279908  |
| H | 3.269426  | -1.076719 | 1.960614  |
| H | 5.232475  | -2.609908 | 2.121333  |
| H | 4.697513  | -2.051682 | 3.718809  |
| H | 4.311812  | -3.691151 | 3.177700  |
| H | 1.034541  | -1.721515 | 2.859804  |
| H | 1.743893  | -3.147672 | 3.629334  |
| H | 2.236843  | -1.530023 | 4.153754  |
| C | 1.318980  | 2.458887  | -2.709771 |
| C | 2.006085  | 3.217625  | -3.862374 |
| C | -0.170652 | 2.208836  | -3.016773 |
| H | 1.802054  | 1.479819  | -2.634906 |
| H | 3.072749  | 3.371211  | -3.662481 |
| H | 1.912950  | 2.652008  | -4.796608 |
| H | 1.552094  | 4.201883  | -4.024867 |
| H | -0.650813 | 1.634198  | -2.217783 |
| H | -0.721018 | 3.149962  | -3.130009 |
| H | -0.275729 | 1.646423  | -3.951816 |
| C | 2.144391  | -2.364269 | -2.822976 |
| C | 0.792052  | -2.659965 | -3.499534 |
| C | 3.318727  | -2.789357 | -3.728321 |
| H | 2.206565  | -1.278905 | -2.693642 |
| H | -0.045683 | -2.373409 | -2.856477 |
| H | 0.715229  | -2.101216 | -4.439686 |
| H | 0.682407  | -3.723287 | -3.741529 |
| H | 4.287058  | -2.531381 | -3.283788 |
| H | 3.311628  | -3.871702 | -3.902248 |
| H | 3.250202  | -2.292739 | -4.703303 |
| C | -3.965347 | -0.393384 | 0.215884  |
| C | -5.180700 | -0.784887 | 0.666547  |
| C | -2.748452 | -2.035140 | 2.076577  |
| H | -3.272287 | -1.551037 | 2.913871  |
| C | -1.833578 | -1.924505 | -0.453790 |
| H | -1.621862 | -1.318689 | -1.350789 |
| B | -2.592852 | -1.106382 | 0.745298  |
| C | -3.815407 | 0.675905  | -0.852757 |
| H | -2.936011 | 0.475841  | -1.476006 |
| H | -4.686131 | 0.755307  | -1.513860 |
| H | -3.652261 | 1.671542  | -0.411830 |
| O | -1.588312 | 0.093377  | 1.096955  |
| C | -1.965439 | 0.949578  | 2.164302  |
| H | -3.037787 | 1.169359  | 2.099295  |
| H | -1.769330 | 0.485580  | 3.141006  |



|    |            |           |           |
|----|------------|-----------|-----------|
| H  | -1.405871  | 1.890965  | 2.100098  |
| H  | -5.192408  | -1.601517 | 1.389172  |
| Cu | 0.175029   | 0.027319  | 0.437651  |
| C  | -6.539484  | -0.337618 | 0.298379  |
| C  | -6.871923  | 0.981883  | -0.069468 |
| C  | -7.596172  | -1.270228 | 0.362529  |
| C  | -8.183189  | 1.336930  | -0.389981 |
| H  | -6.101909  | 1.745378  | -0.074598 |
| C  | -8.904842  | -0.919781 | 0.039980  |
| H  | -7.371277  | -2.291005 | 0.664584  |
| C  | -9.207189  | 0.389345  | -0.345307 |
| H  | -8.406649  | 2.365250  | -0.665987 |
| H  | -9.692368  | -1.668322 | 0.091940  |
| H  | -10.227714 | 0.668515  | -0.595222 |
| H  | -1.761790  | -2.349631 | 2.453963  |
| H  | -3.301773  | -2.960667 | 1.861160  |
| H  | -2.450821  | -2.768785 | -0.793029 |
| H  | -0.876847  | -2.364322 | -0.120991 |

TS12

B3LYP SCF energy: -1924.42504091 a.u.  
 B3LYP enthalpy: -1923.526786 a.u.  
 B3LYP free energy: -1923.664292 a.u.  
 B3LYP-D3BJ SCF energy in solution: -1926.36881791 a.u.  
 B3LYP-D3BJ enthalpy in solution: -1925.470563 a.u.  
 B3LYP-D3BJ free energy in solution: -1925.608069 a.u.  
 Three lowest frequencies (cm-1): -197.5948 10.5358 18.7465  
 Imaginary frequency: -197.5948 cm-1

Cartesian coordinates

| ATOM | X         | Y         | Z         |
|------|-----------|-----------|-----------|
| N    | 2.429821  | 1.029638  | -0.222158 |
| N    | 0.623496  | 2.162512  | 0.047146  |
| C    | 1.078281  | 0.877440  | -0.077737 |
| C    | 2.801643  | 2.368965  | -0.189792 |
| H    | 3.830409  | 2.677744  | -0.288320 |
| C    | 1.661894  | 3.083843  | -0.019795 |
| H    | 1.489452  | 4.145464  | 0.061755  |
| C    | 3.385299  | -0.043582 | -0.379261 |
| C    | 4.010553  | -0.561784 | 0.772640  |
| C    | 3.681717  | -0.500289 | -1.678848 |
| C    | 4.961363  | -1.573073 | 0.587763  |
| C    | 4.638125  | -1.515322 | -1.802515 |
| C    | 5.272901  | -2.046639 | -0.683471 |
| H    | 5.459683  | -1.998801 | 1.453655  |
| H    | 4.886018  | -1.895723 | -2.789289 |
| H    | 6.010845  | -2.835438 | -0.802343 |
| C    | -0.759299 | 2.539609  | 0.233823  |
| C    | -1.558689 | 2.768128  | -0.903669 |
| C    | -1.245418 | 2.689869  | 1.547724  |
| C    | -2.891389 | 3.141011  | -0.691099 |
| C    | -2.586672 | 3.062341  | 1.700499  |
| C    | -3.403703 | 3.282791  | 0.595330  |
| H    | -3.537951 | 3.316543  | -1.545904 |

|   |           |           |           |
|---|-----------|-----------|-----------|
| H | -2.996287 | 3.178209  | 2.699857  |
| H | -4.443200 | 3.565784  | 0.736661  |
| C | -0.377471 | 2.463020  | 2.781944  |
| C | -0.881992 | 1.266381  | 3.610796  |
| C | -0.275287 | 3.736708  | 3.643762  |
| H | 0.635012  | 2.216415  | 2.448228  |
| H | -0.890309 | 0.351273  | 3.010965  |
| H | -0.227999 | 1.101945  | 4.475538  |
| H | -1.897418 | 1.437442  | 3.987317  |
| H | 0.116439  | 4.581586  | 3.065684  |
| H | -1.251402 | 4.032651  | 4.045147  |
| H | 0.395060  | 3.566505  | 4.494387  |
| C | 3.701114  | -0.059994 | 2.180074  |
| C | 4.919313  | 0.663504  | 2.789224  |
| C | 3.204940  | -1.192550 | 3.099918  |
| H | 2.889668  | 0.670921  | 2.109448  |
| H | 5.249981  | 1.498498  | 2.160161  |
| H | 4.669643  | 1.062751  | 3.779364  |
| H | 5.769413  | -0.018228 | 2.910068  |
| H | 2.308268  | -1.671787 | 2.694073  |
| H | 3.973065  | -1.962099 | 3.243021  |
| H | 2.961651  | -0.785409 | 4.089217  |
| C | -1.029469 | 2.628253  | -2.327415 |
| C | -1.050345 | 3.979631  | -3.068970 |
| C | -1.798910 | 1.548347  | -3.112018 |
| H | 0.014004  | 2.303358  | -2.272930 |
| H | -0.466403 | 4.738736  | -2.535670 |
| H | -0.627113 | 3.869586  | -4.074388 |
| H | -2.071958 | 4.361821  | -3.178094 |
| H | -1.767044 | 0.588696  | -2.586680 |
| H | -2.851090 | 1.822802  | -3.250373 |
| H | -1.355942 | 1.415133  | -4.106414 |
| C | 3.004597  | 0.058388  | -2.926543 |
| C | 2.168135  | -1.019857 | -3.642456 |
| C | 4.025849  | 0.701414  | -3.885478 |
| H | 2.312630  | 0.846745  | -2.615282 |
| H | 1.422122  | -1.451247 | -2.967527 |
| H | 1.644082  | -0.584312 | -4.501789 |
| H | 2.797991  | -1.836329 | -4.014680 |
| H | 4.596430  | 1.494922  | -3.389268 |
| H | 4.742501  | -0.035832 | -4.265728 |
| H | 3.512566  | 1.140638  | -4.748963 |
| C | -1.525859 | -2.007289 | -0.538500 |
| C | -2.611750 | -1.557779 | 0.155756  |
| C | -1.103386 | -4.491732 | 0.801552  |
| H | -2.075236 | -4.342679 | 1.285442  |
| C | 1.212164  | -3.370098 | -0.077956 |
| H | 1.884956  | -2.503614 | -0.054007 |
| B | -0.167644 | -3.183134 | 0.736659  |
| C | -1.668991 | -2.646971 | -1.908039 |
| H | -2.576031 | -3.258689 | -2.011999 |
| H | -1.697595 | -1.887399 | -2.704809 |
| H | -0.811962 | -3.290564 | -2.130275 |
| O | 0.026851  | -2.421438 | 1.941366  |
| C | -0.776177 | -2.648090 | 3.079891  |
| H | -0.671657 | -3.677182 | 3.451446  |

|    |           |           |           |
|----|-----------|-----------|-----------|
| H  | -0.448389 | -1.964023 | 3.871252  |
| H  | -1.842920 | -2.469491 | 2.885153  |
| H  | -2.423819 | -1.180446 | 1.163808  |
| Cu | -0.030659 | -0.730389 | -0.122785 |
| C  | -4.055340 | -1.543686 | -0.162534 |
| C  | -4.972048 | -1.509068 | 0.909852  |
| C  | -4.590817 | -1.526582 | -1.466779 |
| C  | -6.348009 | -1.495230 | 0.698104  |
| H  | -4.585430 | -1.503134 | 1.926949  |
| C  | -5.969148 | -1.504948 | -1.681198 |
| H  | -3.925063 | -1.504008 | -2.320415 |
| C  | -6.856677 | -1.497258 | -0.603515 |
| H  | -7.025473 | -1.480808 | 1.548657  |
| H  | -6.351120 | -1.489383 | -2.699339 |
| H  | -7.929975 | -1.484759 | -0.774708 |
| H  | 1.070042  | -3.651601 | -1.128738 |
| H  | 1.768097  | -4.198803 | 0.391648  |
| H  | -0.572533 | -5.276429 | 1.367168  |
| H  | -1.295654 | -4.911481 | -0.192898 |

19

B3LYP SCF energy: -1704.57335183 a.u.  
 B3LYP enthalpy: -1703.805221 a.u.  
 B3LYP free energy: -1703.927568 a.u.  
 B3LYP-D3BJ SCF energy in solution: -1706.41225951 a.u.  
 B3LYP-D3BJ enthalpy in solution: -1705.644129 a.u.  
 B3LYP-D3BJ free energy in solution: -1705.766476 a.u.  
 Three lowest frequencies (cm-1): 9.9317 11.1453 18.5502

#### Cartesian coordinates

| ATOM | X         | Y         | Z         |
|------|-----------|-----------|-----------|
| N    | 2.499198  | 0.088467  | 0.031232  |
| N    | 1.292839  | 1.866307  | -0.029884 |
| C    | 1.197826  | 0.503551  | -0.003002 |
| C    | 3.380239  | 1.164867  | 0.025901  |
| H    | 4.450206  | 1.029442  | 0.049755  |
| C    | 2.618369  | 2.287243  | -0.012726 |
| H    | 2.888013  | 3.331654  | -0.029296 |
| C    | 2.912633  | -1.296219 | 0.068473  |
| C    | 3.082026  | -1.917491 | 1.321654  |
| C    | 3.134177  | -1.967848 | -1.150381 |
| C    | 3.482400  | -3.259374 | 1.327179  |
| C    | 3.533299  | -3.308358 | -1.084662 |
| C    | 3.706404  | -3.949383 | 0.139006  |
| H    | 3.614098  | -3.771461 | 2.275798  |
| H    | 3.704297  | -3.858474 | -2.005403 |
| H    | 4.013682  | -4.991375 | 0.166616  |
| C    | 0.160030  | 2.763632  | -0.069890 |
| C    | -0.343246 | 3.160867  | -1.324640 |
| C    | -0.391105 | 3.210485  | 1.147593  |
| C    | -1.438277 | 4.033668  | -1.333111 |
| C    | -1.485294 | 4.081627  | 1.078866  |
| C    | -2.004379 | 4.490880  | -0.146311 |
| H    | -1.857836 | 4.352413  | -2.282800 |

|    |           |           |           |
|----|-----------|-----------|-----------|
| H  | -1.940580 | 4.437434  | 1.998533  |
| H  | -2.856668 | 5.164374  | -0.176437 |
| C  | 0.138114  | 2.762768  | 2.506377  |
| C  | -0.890897 | 1.875230  | 3.235226  |
| C  | 0.563296  | 3.958645  | 3.380175  |
| H  | 1.030782  | 2.152055  | 2.339654  |
| H  | -1.157650 | 1.001366  | 2.631345  |
| H  | -0.480537 | 1.522015  | 4.188922  |
| H  | -1.811801 | 2.429241  | 3.452016  |
| H  | 1.311564  | 4.579580  | 2.874223  |
| H  | -0.288371 | 4.601362  | 3.631446  |
| H  | 0.996852  | 3.603484  | 4.322325  |
| C  | 2.820664  | -1.197592 | 2.641184  |
| C  | 4.049613  | -1.231924 | 3.569825  |
| C  | 1.571915  | -1.769517 | 3.341915  |
| H  | 2.613805  | -0.146080 | 2.419523  |
| H  | 4.933883  | -0.807212 | 3.080910  |
| H  | 3.852438  | -0.652268 | 4.479074  |
| H  | 4.297948  | -2.253744 | 3.878750  |
| H  | 0.689461  | -1.691254 | 2.697831  |
| H  | 1.709414  | -2.825998 | 3.600864  |
| H  | 1.369363  | -1.220523 | 4.269413  |
| C  | 0.236807  | 2.657163  | -2.642408 |
| C  | 0.692973  | 3.814550  | -3.551254 |
| C  | -0.764020 | 1.735694  | -3.368391 |
| H  | 1.123197  | 2.056549  | -2.415937 |
| H  | 1.420706  | 4.459479  | -3.045370 |
| H  | 1.162388  | 3.419467  | -4.459722 |
| H  | -0.149343 | 4.442767  | -3.862961 |
| H  | -1.051526 | 0.889089  | -2.735860 |
| H  | -1.677347 | 2.276662  | -3.642449 |
| H  | -0.318950 | 1.341791  | -4.290088 |
| C  | 2.926904  | -1.302184 | -2.507272 |
| C  | 1.702190  | -1.897839 | -3.230366 |
| C  | 4.188968  | -1.379225 | -3.387871 |
| H  | 2.717796  | -0.241492 | -2.337428 |
| H  | 0.796956  | -1.791062 | -2.623047 |
| H  | 1.536960  | -1.386184 | -4.186182 |
| H  | 1.844788  | -2.964408 | -3.440632 |
| H  | 5.057415  | -0.939920 | -2.883753 |
| H  | 4.442044  | -2.413505 | -3.647690 |
| H  | 4.028522  | -0.834760 | -4.325649 |
| C  | -2.031948 | -1.649338 | -0.000040 |
| C  | -3.234409 | -1.014542 | -0.007100 |
| C  | -1.932145 | -3.166423 | 0.041543  |
| H  | -2.829849 | -3.666146 | 0.432154  |
| H  | -1.741215 | -3.577642 | -0.962293 |
| H  | -1.081947 | -3.482595 | 0.659344  |
| H  | -3.229928 | 0.078118  | 0.037282  |
| Cu | -0.418248 | -0.592767 | -0.005744 |
| C  | -4.613023 | -1.558371 | -0.010358 |
| C  | -5.627030 | -0.844234 | 0.660942  |
| C  | -4.998116 | -2.730518 | -0.691354 |
| C  | -6.945491 | -1.292684 | 0.687907  |
| H  | -5.361077 | 0.076801  | 1.176421  |
| C  | -6.318719 | -3.181437 | -0.668798 |

|   |           |           |           |
|---|-----------|-----------|-----------|
| H | -4.260391 | -3.276622 | -1.269018 |
| C | -7.299893 | -2.471625 | 0.025960  |
| H | -7.699884 | -0.720909 | 1.223996  |
| H | -6.583885 | -4.088518 | -1.207602 |
| H | -8.327983 | -2.824624 | 0.041821  |

CO2

B3LYP SCF energy: -188.58094022 a.u.  
 B3LYP enthalpy: -188.565756 a.u.  
 B3LYP free energy: -188.590066 a.u.  
 B3LYP-D3BJ SCF energy in solution: -188.64897299 a.u.  
 B3LYP-D3BJ enthalpy in solution: -188.633789 a.u.  
 B3LYP-D3BJ free energy in solution: -188.658099 a.u.  
 Three lowest frequencies (cm-1): 640.0427 640.0427 1372.1017

Cartesian coordinates

| ATOM | X        | Y        | Z         |
|------|----------|----------|-----------|
| C    | 0.000000 | 0.000000 | 0.000000  |
| O    | 0.000000 | 0.000000 | 1.169156  |
| O    | 0.000000 | 0.000000 | -1.169156 |

TS13

B3LYP SCF energy: -1893.14323062 a.u.  
 B3LYP enthalpy: -1892.359807 a.u.  
 B3LYP free energy: -1892.487921 a.u.  
 B3LYP-D3BJ SCF energy in solution: -1895.05867504 a.u.  
 B3LYP-D3BJ enthalpy in solution: -1894.275251 a.u.  
 B3LYP-D3BJ free energy in solution: -1894.403365 a.u.  
 Three lowest frequencies (cm-1): -197.2587 13.2202 14.8612  
 Imaginary frequency: -197.2587 cm-1

Cartesian coordinates

| ATOM | X         | Y         | Z         |
|------|-----------|-----------|-----------|
| N    | -2.477010 | 0.626233  | 0.261439  |
| N    | -0.876463 | 2.062258  | 0.238538  |
| C    | -1.119458 | 0.721585  | 0.164043  |
| C    | -3.064665 | 1.878644  | 0.396413  |
| H    | -4.132393 | 2.001665  | 0.487070  |
| C    | -2.054530 | 2.785659  | 0.381203  |
| H    | -2.059682 | 3.861764  | 0.455032  |
| C    | -3.218609 | -0.614692 | 0.207285  |
| C    | -3.720075 | -1.044810 | -1.038173 |
| C    | -3.420790 | -1.333662 | 1.401868  |
| C    | -4.440836 | -2.245074 | -1.059100 |
| C    | -4.146699 | -2.528103 | 1.319004  |
| C    | -4.650128 | -2.981640 | 0.103297  |
| H    | -4.838463 | -2.609611 | -2.001338 |
| H    | -4.316868 | -3.111239 | 2.219425  |
| H    | -5.206808 | -3.913825 | 0.061024  |
| C    | 0.440466  | 2.652850  | 0.160717  |
| C    | 1.167192  | 2.841083  | 1.353329  |
| C    | 0.942424  | 3.015459  | -1.105176 |

|    |           |           |           |
|----|-----------|-----------|-----------|
| C  | 2.442182  | 3.409757  | 1.247350  |
| C  | 2.224241  | 3.578350  | -1.150239 |
| C  | 2.967676  | 3.773344  | 0.010351  |
| H  | 3.033903  | 3.562664  | 2.145317  |
| H  | 2.646495  | 3.862136  | -2.109784 |
| H  | 3.962056  | 4.207444  | -0.049390 |
| C  | 0.154143  | 2.822180  | -2.397742 |
| C  | 0.853590  | 1.831959  | -3.350324 |
| C  | -0.113793 | 4.171171  | -3.094843 |
| H  | -0.819212 | 2.391118  | -2.143902 |
| H  | 0.953162  | 0.839684  | -2.899485 |
| H  | 0.269653  | 1.722699  | -4.271838 |
| H  | 1.853057  | 2.185389  | -3.630290 |
| H  | -0.637852 | 4.869872  | -2.432264 |
| H  | 0.817993  | 4.651458  | -3.415166 |
| H  | -0.731995 | 4.019485  | -3.987219 |
| C  | -3.538029 | -0.244671 | -2.325300 |
| C  | -4.875155 | 0.388217  | -2.763817 |
| C  | -2.922578 | -1.082631 | -3.461894 |
| H  | -2.840389 | 0.573737  | -2.121341 |
| H  | -5.298423 | 1.026127  | -1.978839 |
| H  | -4.730833 | 1.002944  | -3.660047 |
| H  | -5.618506 | -0.381690 | -3.002159 |
| H  | -1.943591 | -1.481958 | -3.181248 |
| H  | -3.569242 | -1.920549 | -3.747416 |
| H  | -2.789727 | -0.455160 | -4.351529 |
| C  | 0.624332  | 2.443913  | 2.722707  |
| C  | 0.502522  | 3.661791  | 3.659405  |
| C  | 1.476983  | 1.330640  | 3.362634  |
| H  | -0.383007 | 2.038768  | 2.585781  |
| H  | -0.130766 | 4.441965  | 3.221720  |
| H  | 0.060393  | 3.362426  | 4.616925  |
| H  | 1.481235  | 4.107436  | 3.871375  |
| H  | 1.521939  | 0.449178  | 2.714266  |
| H  | 2.504347  | 1.666421  | 3.545227  |
| H  | 1.047389  | 1.029283  | 4.325490  |
| C  | -2.893774 | -0.861332 | 2.753566  |
| C  | -1.894278 | -1.867619 | 3.355381  |
| C  | -4.047449 | -0.567189 | 3.733276  |
| H  | -2.351635 | 0.076708  | 2.600749  |
| H  | -1.058810 | -2.049254 | 2.671584  |
| H  | -1.488866 | -1.481837 | 4.298521  |
| H  | -2.370699 | -2.831677 | 3.567435  |
| H  | -4.738800 | 0.179101  | 3.325235  |
| H  | -4.626773 | -1.470995 | 3.954893  |
| H  | -3.653795 | -0.183424 | 4.681872  |
| C  | 1.701186  | -1.996916 | 0.030834  |
| C  | 2.819439  | -1.551982 | -0.606841 |
| C  | 1.720520  | -2.988811 | 1.172947  |
| H  | 2.569336  | -3.685249 | 1.128183  |
| H  | 1.761529  | -2.480079 | 2.147612  |
| H  | 0.804007  | -3.586323 | 1.151785  |
| H  | 2.654216  | -0.970706 | -1.515850 |
| Cu | 0.205593  | -0.687834 | -0.018777 |
| C  | 4.249485  | -1.778718 | -0.328214 |
| C  | 5.164674  | -1.647915 | -1.393132 |

|   |          |           |           |
|---|----------|-----------|-----------|
| C | 4.770399 | -2.086849 | 0.944438  |
| C | 6.529673 | -1.851091 | -1.208503 |
| H | 4.784964 | -1.394650 | -2.380490 |
| C | 6.138302 | -2.282608 | 1.132295  |
| H | 4.103429 | -2.148311 | 1.796101  |
| C | 7.024120 | -2.173712 | 0.058150  |
| H | 7.209514 | -1.755068 | -2.051466 |
| H | 6.514760 | -2.516191 | 2.125250  |
| H | 8.089325 | -2.329516 | 0.207908  |
| C | 0.423531 | -2.620572 | -1.548816 |
| O | 0.461209 | -1.810671 | -2.451319 |
| O | 0.027435 | -3.686884 | -1.168720 |

20

|                                               |                     |         |         |
|-----------------------------------------------|---------------------|---------|---------|
| B3LYP SCF energy:                             | -1893.20453221 a.u. |         |         |
| B3LYP enthalpy:                               | -1892.418126 a.u.   |         |         |
| B3LYP free energy:                            | -1892.546828 a.u.   |         |         |
| B3LYP-D3BJ SCF energy in solution:            | -1895.10777247 a.u. |         |         |
| B3LYP-D3BJ enthalpy in solution:              | -1894.321366 a.u.   |         |         |
| B3LYP-D3BJ free energy in solution:           | -1894.450068 a.u.   |         |         |
| Three lowest frequencies (cm <sup>-1</sup> ): | 8.3444              | 12.4457 | 17.2986 |

Cartesian coordinates

| ATOM | X          | Y         | Z         |
|------|------------|-----------|-----------|
| Cu   | 0.126129   | -0.036561 | 0.620223  |
| N    | 2.680570   | -1.001650 | -0.498820 |
| N    | 2.561554   | 1.146530  | -0.559480 |
| C    | 1.872478   | 0.041642  | -0.153369 |
| C    | 3.848161   | -0.556256 | -1.108230 |
| C    | 3.773055   | 0.798897  | -1.146319 |
| H    | 4.609751   | -1.238685 | -1.451375 |
| H    | 4.455846   | 1.540641  | -1.529914 |
| C    | -3.898779  | -0.159771 | 1.023474  |
| C    | -4.862379  | -0.119837 | 0.078014  |
| C    | -4.111817  | -0.253753 | 2.512677  |
| H    | -4.497120  | -0.133688 | -0.947294 |
| C    | -2.467152  | -0.132477 | 0.535236  |
| O    | -2.197030  | -0.126940 | -0.684083 |
| O    | -1.566124  | -0.106292 | 1.468191  |
| C    | -6.324761  | -0.096553 | 0.220141  |
| C    | -7.003505  | 0.496581  | 1.302788  |
| C    | -7.104472  | -0.659633 | -0.810426 |
| C    | -8.396891  | 0.494677  | 1.364464  |
| H    | -6.437672  | 0.991725  | 2.084043  |
| C    | -8.495520  | -0.670069 | -0.745126 |
| H    | -6.600043  | -1.101713 | -1.666464 |
| C    | -9.150145  | -0.095181 | 0.347402  |
| H    | -8.896352  | 0.965137  | 2.207865  |
| H    | -9.070512  | -1.121371 | -1.549899 |
| H    | -10.235797 | -0.095928 | 0.398960  |
| H    | -3.340736  | -0.888341 | 2.956647  |
| H    | -4.018928  | 0.727627  | 2.998453  |
| H    | -5.097378  | -0.660240 | 2.757331  |
| C    | 2.348555   | -2.391730 | -0.278764 |
| C    | 2.748309   | -2.997138 | 0.929676  |

|   |           |           |           |
|---|-----------|-----------|-----------|
| C | 1.637576  | -3.082355 | -1.280494 |
| C | 2.412302  | -4.343029 | 1.118039  |
| C | 1.330978  | -4.427496 | -1.037608 |
| C | 1.712246  | -5.052675 | 0.145913  |
| H | 2.697540  | -4.839199 | 2.041060  |
| H | 0.780013  | -4.989187 | -1.786126 |
| H | 1.459316  | -6.096171 | 0.313573  |
| C | 2.079683  | 2.502630  | -0.417796 |
| C | 2.403544  | 3.214189  | 0.754970  |
| C | 1.304801  | 3.055094  | -1.457196 |
| C | 1.923520  | 4.524517  | 0.866601  |
| C | 0.854045  | 4.371028  | -1.291114 |
| C | 1.157861  | 5.098995  | -0.144583 |
| H | 2.146814  | 5.099936  | 1.760352  |
| H | 0.250302  | 4.826774  | -2.070323 |
| H | 0.793258  | 6.116995  | -0.036295 |
| C | 3.487757  | -2.237669 | 2.026906  |
| C | 4.807219  | -2.927652 | 2.422668  |
| C | 2.579162  | -2.024528 | 3.254672  |
| H | 3.746635  | -1.246931 | 1.640740  |
| H | 5.463438  | -3.065356 | 1.555767  |
| H | 5.343221  | -2.321803 | 3.162547  |
| H | 4.633155  | -3.913147 | 2.869397  |
| H | 1.664517  | -1.488704 | 2.979077  |
| H | 2.285994  | -2.980970 | 3.703144  |
| H | 3.102799  | -1.440284 | 4.020926  |
| C | 1.201863  | -2.432610 | -2.590759 |
| C | -0.332917 | -2.419190 | -2.740417 |
| C | 1.876724  | -3.114372 | -3.798260 |
| H | 1.532749  | -1.389619 | -2.582349 |
| H | -0.818005 | -1.852674 | -1.938626 |
| H | -0.608172 | -1.950557 | -3.692937 |
| H | -0.742907 | -3.436356 | -2.742901 |
| H | 2.969732  | -3.096994 | -3.712941 |
| H | 1.567059  | -4.161641 | -3.893435 |
| H | 1.599478  | -2.601308 | -4.726383 |
| C | 0.949398  | 2.290313  | -2.728698 |
| C | 1.576035  | 2.958391  | -3.969412 |
| C | -0.575301 | 2.126417  | -2.889448 |
| H | 1.374150  | 1.284493  | -2.653578 |
| H | 2.665005  | 3.045495  | -3.874981 |
| H | 1.358317  | 2.368813  | -4.867519 |
| H | 1.174298  | 3.965893  | -4.128722 |
| H | -1.016561 | 1.570742  | -2.055564 |
| H | -1.076362 | 3.099254  | -2.961371 |
| H | -0.793576 | 1.574822  | -3.811870 |
| C | 3.215364  | 2.603275  | 1.893383  |
| C | 2.336278  | 2.387114  | 3.141770  |
| C | 4.463550  | 3.442042  | 2.227808  |
| H | 3.566323  | 1.617990  | 1.571485  |
| H | 1.476404  | 1.748608  | 2.912350  |
| H | 2.916950  | 1.908348  | 3.939446  |
| H | 1.954064  | 3.338667  | 3.529354  |
| H | 5.101634  | 3.579355  | 1.347389  |
| H | 4.196314  | 4.436009  | 2.604312  |
| H | 5.056704  | 2.944543  | 3.003921  |
